1 **Human follicular helper T cell promoter connectomes reveal novel genes and**  
2 **regulatory elements at SLE GWAS loci**

3

4

5 Chun Su<sup>1\*</sup>, Matthew E. Johnson<sup>1\*</sup>, Annabel Torres<sup>2\*</sup>, Rajan M. Thomas<sup>2\*</sup>, Elisabetta  
6 Manduchi<sup>1,3</sup>, Prabhat Sharma<sup>2</sup>, Carole Le Coz<sup>4</sup>, Michelle E. Leonard<sup>1</sup>, Sumei Lu<sup>1</sup>,  
7 Kenyaita M. Hodge<sup>1</sup>, Alessandra Chesi<sup>1</sup>, James Pippin<sup>1</sup>, Neil Romberg<sup>4,5</sup>, Struan F. A.  
8 Grant<sup>1,5,6,7\*</sup> and Andrew D. Wells<sup>2,8\*</sup>

9

10 <sup>1</sup>Division of Human Genetics, The Children's Hospital of Philadelphia, Philadelphia, PA

11 <sup>2</sup>Department of Pathology, The Children's Hospital of Philadelphia, Philadelphia, PA

12 <sup>3</sup>Institute for Biomedical Informatics, University of Pennsylvania, Philadelphia, PA

13 <sup>4</sup>Division of Allergy and Immunology, The Children's Hospital of Philadelphia, Philadelphia, PA

14 <sup>5</sup>Department of Pediatrics, Perelman School of Medicine, University of Pennsylvania, Philadelphia, PA

15 <sup>6</sup>Division of Diabetes and Endocrinology, The Children's Hospital of Philadelphia, Philadelphia, PA

16 <sup>7</sup>Department of Genetics, Perelman School of Medicine, University of Pennsylvania, Philadelphia, PA

17 <sup>8</sup>Department of Pathology and Laboratory Medicine, Perelman School of Medicine, University of  
18 Pennsylvania, Philadelphia, PA

19

20 \*Authors contributed equally

21 Address correspondence to Andrew D. Wells, [adwells@pennmedicine.upenn.edu](mailto:adwells@pennmedicine.upenn.edu)

## 22 **ABSTRACT**

23 Systemic lupus erythematosus (SLE) is a complex inflammatory disease mediated by  
24 autoreactive antibodies that damages multiple tissues in children and adults. Genome-  
25 wide association studies (GWAS) have statistically implicated hundreds of loci in the  
26 susceptibility to human disease, including SLE, but the majority have failed to identify the  
27 causal variants or the effector genes. As a physicochemical approach to detecting  
28 functional variants and connecting them to target genes, we generated comprehensive,  
29 high-resolution maps of SLE variant accessibility and gene connectivity in the context of  
30 the three-dimensional chromosomal architecture of human tonsillar follicular helper T  
31 cells (TFH), a cell type required for the production of anti-nuclear antibodies characteristic  
32 of SLE. These spatial epigenomic maps identified a shortlist of over 400 potentially  
33 functional variants across 48 GWAS-implicated SLE loci. Twenty percent of these  
34 variants were located in open promoters of highly-expressed TFH genes, while 80%  
35 reside in non-promoter genomic regions that are connected in 3D to genes that likewise  
36 tend to be highly expressed in TFH. Importantly, we find that 90% of SLE-associated  
37 variants exhibit spatial proximity to genes that are not nearby in the 1D sequence of the  
38 genome, and over 60% of variants 'skip' the nearest gene to physically interact only with  
39 the promoters of distant genes. Gene ontology confirmed that genes in spatial proximity  
40 to SLE variants reside in highly SLE-relevant networks, including accessible variants that  
41 loop 200-1000 kb to interact with the promoters of the canonical TFH genes *BCL6* and  
42 *CXCR5*. CRISPR-Cas9 genome editing confirmed that these variants reside in novel,  
43 distal regulatory elements required for normal *BCL6* and *CXCR5* expression by T cells.  
44 Furthermore, SLE-associated SNP-promoter interactomes implicated a set of novel

45 genes with no known role in TFH or SLE disease biology, including the homeobox-  
46 interacting protein kinase HIPK1 and the Ste kinase homolog MINK1. Targeting these  
47 kinases in primary human TFH cells inhibited production of IL-21, a requisite cytokine for  
48 production of class-switched antibodies by B cells. This 3D-variant-to-gene mapping  
49 approach gives mechanistic insight into the SLE-associated regulatory architecture of the  
50 human genome.

## 51 INTRODUCTION

52

53 GWAS has been an important tool in understanding the genetic basis of complex,  
54 heritable diseases and traits. However, GWAS is typically powered to identify relatively  
55 large blocks of the genome containing dozens to hundreds of single nucleotide  
56 polymorphisms (SNP) in linkage disequilibrium (LD), any one of which could be  
57 responsible for the association of the entire locus with disease susceptibility. Moreover,  
58 ~90% of GWAS-implicated SNP are intergenic or intronic, and do not affect the coding  
59 sequence of proteins. Therefore, the location of the GWAS signal *per se* does not identify  
60 the culprit gene(s). Examples of this are the *FTO* GWAS signal in obesity<sup>1,2</sup>, and the  
61 *TCF7L2* GWAS signal in type 2 diabetes<sup>3</sup>, in which each suspected causal variant resides  
62 in an intron of the local gene, but were shown instead to regulate expression of the distant  
63 genes *IRX3/5* and *ACSL5*, respectively.

64 Systemic lupus erythematosus (SLE) is a complex inflammatory disease mediated by  
65 autoreactive antibodies that damage skin, joints, kidneys, brain and other tissues in  
66 children and adults<sup>4</sup>. An important inflammatory leukocyte required for the development  
67 of SLE is the follicular helper T cell (TFH). TFH differentiate from naïve CD4<sup>+</sup> T cells in  
68 the lymph nodes, spleen, and tonsil, where they license B cells to produce high affinity  
69 protective or pathogenic antibodies<sup>5,6</sup>. Given the central role for TFH in the regulation of  
70 humoral immune responses, genetic susceptibility to SLE is highly likely to manifest  
71 functionally in this immune cell population.

72 GWAS has associated over 60 loci with SLE susceptibility to date<sup>7,8</sup>, but this  
73 represents thousands of SNP in LD of which any could potentially contribute to disease.

74 Given the paucity of immune cell eQTL data represented in GTEx, we mapped the open  
75 chromatin landscape of TFH cells from human tonsil to identify potentially functional SLE  
76 variants, and conducted a genome-wide, promoter-focused Capture-C analysis of  
77 chromatin contacts at nearly all of the ~41,000 annotated human protein-coding and non-  
78 coding genes at ~270 bp resolution to map these variants to the genes they likely regulate  
79 in this disease-relevant cell type. This approach leverages the power of existing SLE  
80 genetic knowledge, using the location of common variants that have already been  
81 strongly associated with SLE pathogenesis to identify (*via* assessment of linkage  
82 disequilibrium) putative disease-associated regulatory elements. We then utilize high-  
83 resolution, promoter-focused Capture-C to physically connect these variants to their  
84 target genes, in line with our previous, comparable approach to studying bone mineral  
85 density loci<sup>14</sup>. This approach only requires three replicate samples to make valid  
86 interaction calls, and it does not require material from SLE patients or genotyped  
87 individuals. By design, we are not studying the effect of a variant in the system, but rather,  
88 we are using reported variants as ‘signposts’ to identify potential enhancers in healthy  
89 tissue. The variant connectomes in turn lead us to putative effector genes that warrant  
90 further follow up. This study shows that the majority of accessible SLE-associated  
91 variants do not interact with the nearest promoter, but are instead connected to more  
92 distant genes, many of which have known roles in T cell and TFH biology. Using  
93 CRISPR/CAS9 genome editing, we go on to validate several of these SLE-associated  
94 open chromatin regions, revealing a requisite role in regulating their connected genes.  
95 Finally, we experimentally verified that two novel kinases implicated by this variant-to-  
96 gene mapping approach are required for TFH differentiation and/or function, and

97 therefore represent potential novel drug targets for SLE and other antibody-mediated  
98 diseases.

99 **RESULTS**

100

101 ***Comparative open chromatin landscapes of naïve CD4+ T cells and TFH from***  
102 ***human tonsil***

103

104 The vast majority (>90%) of the human genome is packed tightly into cellular  
105 chromatin and is not accessible to the nuclear machinery that regulates gene expression<sup>9</sup>.  
106 Consequently, >95% of transcription factor and RNA polymerase occupancy is  
107 concentrated at regions of open chromatin<sup>9</sup>, and thus a map of accessible chromatin in a  
108 given cell type essentially defines its potential gene regulatory landscape. As a step  
109 toward defining the disease-associated regulatory architecture of the complex heritable  
110 autoimmune disease SLE, we focused on human follicular helper CD4+ T cells (TFH),  
111 which are required for the production of pathogenic antibodies by autoreactive B cells  
112 during the development of SLE<sup>4</sup>. Tonsillar TFH are derived from naïve CD4+ T cell  
113 precursors, and represent a population of cells in healthy subjects that are actively in the  
114 process of helping B cells to produce high-affinity, class-switched antibodies. We sorted  
115 naïve CD4+CD45RO- T cells and differentiated CD4+CD45RO+CD25-CXCR5<sup>hi</sup>PD1<sup>hi</sup>  
116 TFH<sup>10</sup> from human tonsil and generated open chromatin maps of both cell types from  
117 three donors using ATAC-seq<sup>11</sup>. A binary peak calling approach identified a total of 91,222  
118 open chromatin regions (OCR), 75,268 OCR in naïve CD4+ cells and 74,627 OCR in TFH  
119 cells (**Supplemental Table 1**). Further quantitative analysis of the accessibility signal at  
120 these OCR revealed a similar overall degree of genomic accessibility (~1.4%) in both cell  
121 types (**Supplemental Figure 1**). However, the differentiation of naïve CD4+ T cells into  
122 TFH is associated with remodeling of 22% of the T cell open chromatin landscape, with

123 11,228 OCR becoming more accessible, and 8,804 OCR becoming less accessible, in  
124 the TFH lineage (**Figure 1A, Supplemental Table 1**). Among all 20,032 differentially  
125 accessible regions, 20.5% (4100) reside in promoters, and the genes driven by these  
126 differentially accessible promoters tended to be differentially expressed between TFH and  
127 naïve CD4+ cells as assessed by microarray (**Figure 1B**, GSEA enrichment  $p < 0.05$ ,  
128  $\text{absNES} > 3.5$ , **Supplemental Table 2**). The functions of genes that are remodeled and  
129 upregulated in TFH were significantly enriched for CD28 costimulatory, G-protein, Rho  
130 GTPase, semaphorin, and TLR signaling pathways (hypergeometric test,  $\text{FDR} < 0.05$ ,  
131 **Supplemental Figure 2A**). Conversely, gene promoters that become less accessible  
132 upon TFH differentiation are enriched for pathways involved in chemokine and G protein-  
133 coupled signaling (**Supplemental Figure 2B**). These data show that global chromatin  
134 remodeling dynamics faithfully reflect dynamic changes in gene expression during the  
135 differentiation of follicular helper T cells from their naïve precursors.

136

### 137 ***Open chromatin mapping of disease-relevant tissue implicates causal disease*** 138 ***variants***

139

140 Of the 7662 sentinel and proxy SNPs currently implicated by GWAS in SLE ( $r^2 > 0.4$ )<sup>7,8</sup>,  
141 432 (5.6%) reside in 246 open chromatin regions in either naïve CD4+ T cells or TFH  
142 (**Supplemental Table 3**). Of these, 345 SNPs (80%) are in open chromatin shared by  
143 both cell types, 39 are in naïve-specific OCR, and 48 reside uniquely within the TFH open  
144 chromatin landscape (**Figure 2A**). Altogether, 91% (393 of 432) of the accessible SLE  
145 SNPs identified in this study reside in the open chromatin landscape of TFH cells. To  
146 explore the potential significance of these open chromatin-implicated variants, we first



147 focused on the 132 SLE proxy SNPs that reside in open promoters of protein-coding  
148 genes in TFH. Of the 64 genes containing one or more open promoter variants, 62 are  
149 expressed in TFH as assessed by microarray (**Supplemental Table 2**). Moreover, the  
150 set of genes with accessible SLE variants in their promoters are expressed more highly  
151 in TFH than the set of all genes, or compared to a random sample of genes with open  
152 promoters in TFH (**Figure 2B**). Eighty-three SLE proxy SNPs reside in promoters of 36  
153 genes in the top 75% expression quantile, and 43 SLE proxy SNPs reside in the  
154 promoters of 18 genes in the 50-75% expression quantile. Thus, nearly 93% (123 of 132)  
155 of open promoter SLE proxy variants are positioned at genes moderately to highly  
156 expressed in TFH. Ingenuity pathway analysis (IPA) found that these TFH expressed  
157 genes are enriched for factors involved in systemic lupus erythematosus ( $P=4.6 \times 10^{-9}$ ),  
158 systemic autoimmunity ( $p=6.0 \times 10^{-8}$ ), and rheumatic disease ( $P=2.7 \times 10^{-7}$ ) (**Figure 2C**),  
159 including *PTPRC* (CD45), *TCF7* (TCF1), *IRF5*, *IFNLR1*, *TYK2*, *ELF1*, *IKZF2* and *JAK2*.  
160 This set of highly-expressed TFH genes with SLE variants in their promoters also includes  
161 *DHCR7* and *NADSYN1*, enzymes involved in biogenesis of vitamin D, a process known  
162 to play an important role in autoimmune disease susceptibility<sup>12</sup>. These results indicate  
163 that open chromatin landscapes in disease-relevant cell types represent a highly specific  
164 filter through which putatively functional SLE variants can be distinguished from the  
165 thousands of proxy SNPs to the sentinels implicated by GWAS.

166

### 167 ***Analysis of the three-dimensional promoter connectome structure in TFH cells***

168

169 It is relatively clear how genetic variation at a promoter might influence expression of  
170 the downstream gene. However, ~70% of the accessible SLE SNPs in TFH cells are

171 intronic, intergenic, or otherwise not in proximity to a promoter, so how these variants  
172 regulate the expression of specific TFH genes is not clear from 1-dimensional open  
173 chromatin mapping alone. To explore the role that accessible, non-coding SLE-  
174 associated variants play in the disease-related regulatory architecture of the human  
175 genome, we derived genome-wide, three-dimensional promoter contact maps of naive  
176 CD4<sup>+</sup> T cells and differentiated follicular helper CD4<sup>+</sup> T cells from human tonsil using  
177 promoter-focused Capture-C technology. Our chromosome conformation capture (3C)-  
178 based approach is a high-resolution, large-scale modification of Capture-C<sup>13</sup> that involves  
179 massively parallel, hybridization-based enrichment of 41,970 targeted promoters  
180 associated with 123,526 currently annotated transcripts (gencode v19) covering 89% of  
181 protein-coding mRNA genes and 59% of non-coding (anti-sense RNA, snRNA, miRNA,  
182 snoRNA and lincRNA) genes in the human genome<sup>14</sup>. As in standard capture-C  
183 approaches, valid hybrid reads derived from ligation of distant fragments with bait  
184 fragments were preprocessed using HiCUP<sup>15</sup>, and significant promoter-interacting  
185 regions (PIR, score >5) were called using CHiCAGO<sup>16</sup>. Unlike promoter capture Hi-C<sup>17</sup>,  
186 our method employs the 4-cutter DpnII to generate 3C libraries with a 270 bp median  
187 resolution, ~9-fold higher than the 2300 bp median resolution of the HindIII-based 3C  
188 libraries generated in HiC and capture-HiC approaches. This resolution allows mapping  
189 of interactions between promoters and distal regulatory elements to within a span of two  
190 nucleosomes. This precision comes at the expense of power, in that sequencing reads  
191 are distributed across more fragments, leaving fewer reads available per fragment to call  
192 significant promoter interactions. To circumvent this problem, we called promoter  
193 interactions both at high resolution (single-fragment) and at lower resolution (four-

194 fragment) after an *in silico* fragment concatenation step. Combination of both sets of calls  
195 allows this method to benefit from the precision of single DpnII fragment analysis and the  
196 power of lower resolution analyses at farther distances to assemble comprehensive, 3D  
197 promoter contact maps for the human genome (**Figure 3A**).

198 We detected a similar number of significant promoter interactions (CHiCAGO score  
199 >5) in both cell types - 255,238 in naive CD4+ T cells and 224,263 in TFH - with the vast  
200 majority (>99%) being intra-chromosomal (*in cis*). About 20% of total interactions were  
201 between two promoters, while 80% of interactions were between a promoter and an  
202 intergenic or intronic region (**Supplemental Table 4**). Ninety percent of promoters were  
203 found engaged in at least one stable interaction with another genomic region. Of these  
204 promoters, over 80% were connected to only one distal genomic region, indicating that  
205 most promoters in these cell types exhibit very low spatial complexity. However, ~1% of  
206 all promoters exhibited significant spatial complexity, interacting with four or more distal  
207 regions, with some promoters engaging in as many as 70 interactions with distal regions.  
208 The number of connections per promoter correlated with the level of gene expression in  
209 both cell types, with the most interactive promoters belonging to highly-expressed genes  
210 with known roles in TFH function (**Figure 3B**). Two examples are the *IL21* and *IFNG*  
211 promoters, which are expressed and show complex connectomes in TFH but not naïve  
212 cells (**Figures 3C and D**). Promoter-interacting regions in both cell types were enriched  
213 3-fold for open chromatin, and 2-fold for chromatin signatures associated with active  
214 transcription, such as H3K27ac, H3K4me1, H3K4me3 (**Figure 4A and Supplemental**  
215 **Figure 3A**). Conversely, PIR in both cell types were depleted of the silencing marks  
216 H3K27me3 and H3K9me3 (**Figure 4A and Supplement Figure 3A**). Together, these

217 trends indicate that the promoter contacts captured by this approach preferentially  
218 represent the active regulatory architectures of the associated genes.

219

### 220 ***The promoter-open chromatin connectome of TFH cells***

221

222 To further explore the regulatory nature of the spatial connections between promoters  
223 and other genomic regions in the nucleus, we focused on contacts between promoters  
224 and open chromatin regions, as the biochemical processes that regulate transcription  
225 occur largely at accessible DNA<sup>9</sup>. Instead of using standard fragment-based  
226 interactions<sup>13</sup>, we used a feature-based calling approach to define interactions between  
227 promoters (-1500 to +500 from a TSS) and OCR, combining calls at both one- and four-  
228 fragment resolution to generate genome-wide, open chromatin-promoter interaction  
229 landscapes in naïve and follicular helper CD4+ T cells (**Figure 3A**). In total, we detected  
230 71,137 *cis*-interactions between accessible promoters and open chromatin among both  
231 cell types, involving 34% of the total open chromatin landscape identified by our ATAC-  
232 seq analyses (**Supplemental Table 5**). We define these 31,404 promoter-interacting  
233 OCR as iOCR. Roughly half of iOCR (15,109, 48%) are located in intergenic or intronic  
234 regions relatively far from genes, while the other 16,295 promoter-interacting OCR (52%)  
235 are located in the promoters of other distant genes. The distance between promoter and  
236 promoter-interacting OCR pairs ranged from a few hundred base pairs to over a  
237 megabase, with a median of ~112 kb for both categories. Remarkably, while OCR in  
238 general are enriched for active chromatin marks<sup>9,11</sup>, we find that iOCR are even more  
239 highly enriched for enhancer signatures compared to OCR that are not contacting a  
240 promoter (14-fold for H3K4me1, 9-fold for H3K27ac, 7-fold for H3K4me3, Fisher test

241  $p < 2 \times 10^{-16}$ , **Figure 4B** and **Supplemental Figure 3B**. Chromatin state modeling  
242 (chromoHMM<sup>18</sup>) revealed that all iOCR are enriched at active promoters, bivalent  
243 promoters, and active enhancers, as defined by histone modification ChIP-seq in both  
244 naïve and TFH cells<sup>19–21</sup> (**Figure 4C** and **Supplemental Figure 3C**). Open promoter  
245 regions involved in promoter interactions (prOCR) were more specifically enriched with  
246 active promoter signatures, while promoter-interacting OCR located in intergenic/intronic  
247 space (nonprOCR) were more specifically enriched at poised and active enhancers  
248 (**Figure 4C**). These results indicate that promoter-connected OCR are biochemically  
249 distinct from OCR not connected to a promoter, and that this promoter-Capture-C  
250 approach enriches for genomic elements that are actively engaged in gene regulation.

251 Using this open chromatin-promoter interaction landscape, we were able to connect  
252 the promoters of 18,669 genes (associated with 79,330 transcripts) to their corresponding  
253 putative regulatory elements, representing 145,568 distinct gene-OCR interactions.  
254 Roughly half (47%, 68,229) of these interactions occur in both naïve and TFH cells, while  
255 24% (34,928) occur uniquely in naïve cells, and 29% (42,411) are only found in TFH  
256 (**Figure 5A**). Overall, 91% of OCR-connected genes (17,021) exhibit at least one  
257 differential promoter-OCR interaction in naïve vs. follicular helper T cells. The majority  
258 (82%) of OCR-connected genes were incorporated into regulatory structures consisting  
259 of more than one distal regulatory region in naïve and follicular helper T cells. On average,  
260 each of these connected genes interact with 6 OCR in both naïve CD4<sup>+</sup> T cells and  
261 follicular helper T cells (4 in median, **Supplemental Figure 4**), with 10% of these genes  
262 involved in 13 or more interactions with distal OCR. More interestingly, the degree of  
263 spatial connectivity exhibited by a promoter tends to positively correlate with the level of

264 gene expression in a lineage-specific manner (**Figure 5B and C**). The common, highly-  
265 connected promoters in both cell types drive the expression of genes involved in cell  
266 cycle, DNA organization and repair, protein and RNA biogenesis and trafficking, and TCR  
267 signaling (**Supplemental Figure 5**). In addition, highly interactive promoters in naïve cells  
268 are involved in quiescence, signal transduction and immune function (e.g., *FOXP1*,  
269 *CCR7*, *IKZF1*, *CD3*, *FYN*, *GRB2*, *GRAP2*, *BIRC2/3*; **Figure 5B**), while gene promoters  
270 that exhibit complex regulatory architectures in TFH are highly expressed in TFH and are  
271 involved in TFH and T cell differentiation, survival, homing, and function (e.g., *BCL6*,  
272 *CXCR5*, *CD40L*, *CTLA4*, *ICOS*, *CD2*, *CD3*, *CD28*, *CD69*, *TCF7*, *NFAT1*, *BATF*, *ITK*,  
273 *IKZF2*, *IKZF3*, *IL21R*, *FAS*; **Figure 5C**). An example is the *CD28-CTLA4-ICOS* multi-  
274 locus region. In naïve CD4<sup>+</sup> T cells, which express *CD28* but not *CTLA4* or *ICOS*, the  
275 *CD28* promoter is engaged in multiple interactions with 8 downstream regions of open  
276 chromatin (**Figure 5D**, blue), while the *CTLA4* and *ICOS* promoters are much less  
277 interactive. In TFH, which express all three genes, the *CD28*, *CTLA4*, and *ICOS*  
278 promoters adopt extensive, *de novo* spatial conformations involving contacts with more  
279 than two dozen putative regulatory elements within the TFH-specific open chromatin  
280 landscape (**Figure 5D**, red). Together, these results reveal major restructuring of the T  
281 cell gene regulatory architecture that occurs as naïve helper T cells differentiate into  
282 follicular helper T cells, and indicate that complex, three-dimensional regulatory  
283 architectures are a feature of highly expressed, lineage-specific genes involved in  
284 specialized immune functions in this disease-relevant cell types.

## 285 **Disease-associated variant-to-gene mapping for SLE**

286 The open chromatin landscape of follicular helper T cells from the three healthy tonsils  
287 studied contained 393 accessible genomic regions that harbor SLE disease variants  
288 (**Supplemental Table 3**), representing the TFH component of the potential *cis*-regulatory  
289 landscape of SLE. While 33% of accessible variants (132 proxy SNPs) reside in  
290 promoters, 67% of accessible SLE SNPs (N=261) are in non-promoter regions.  
291 Therefore, the role these non-promoter variants play in gene transcription, and which  
292 genes they control, is not clear from these one-dimensional epigenomic data. To  
293 determine whether spatial proximity of a gene to an open SLE SNP in three dimensions  
294 is a predictor of its role in TFH and/or SLE, we explored the 3D *cis*-regulatory architecture  
295 of SLE genetic susceptibility based upon open chromatin region interaction landscape  
296 generated in TFH cells, effectively mapping 256 open SLE variants (69 sentinels,  $r^2 > 0.4$ )  
297 to 330 potential target genes (1107 SNP-target gene pairs). This 3D variant-to-gene map  
298 shows that only ~9% (22) of the SLE variants that reside in TFH open chromatin interact  
299 exclusively with the nearest gene promoter (**Supplemental Table 6**). An example of this  
300 category is rs35593987, a proxy to the SLE sentinel SNP rs11889341 and rs4274624  
301 that resides in a TFH OCR and loops ~99 kb to interact with the *STAT4* promoter (**Figure**  
302 **6A**). Another ~30% (75) of open SLE variants interact with nearest promoter, but also  
303 with the promoters of more distant genes (**Figure 6A, Supplemental Table 6**). An  
304 example of this category is rs112677036, a proxy to the SLE sentinel SNP rs12938617  
305 that resides in the first intron of *IKZF3*, interacts with nearby *IKZF3* promoter, but also  
306 interacts with promoters of two 157kb upstream genes *PGAP3* and *ERBB2* (**Figure 6B**).  
307 Remarkably, over 60% of all open SLE variants (159) 'skip' the nearest gene to interact

308 with at least one distant promoter (**Supplemental Table 6**). Examples of this most  
309 abundant category are rs34631447, a proxy to the SLE sentinel rs6762714 SNP that  
310 resides in open chromatin in the sixth intron of the *LPP* locus, and the intergenic  
311 rs527619 and rs71041848 SNPs proxy to SLE sentinel rs4639966. Our 3D regulatory  
312 map in TFH cells demonstrates that the '*LPP*' variant in fact does not interact with the  
313 *LPP* promoter, but instead is incorporated into a chromosomal loop structure spanning  
314 over 1 Mb that positions it in direct, spatial proximity to the promoter of *BCL6*, the 'master'  
315 transcription factor of follicular helper T cells<sup>22–26</sup> (**Figure 6C**). Similarly, the OCR  
316 containing the SLE proxies rs527619 and rs71041848 does not contact the nearby *TREH*  
317 gene, but instead loops to interact with the promoter of the TFH-specific chemokine  
318 receptor gene *CXCR5*, nearly 200 kb away (**Figure 6D**). Other relevant examples of this  
319 class of SLE SNPs are rs3117582 and rs7769961, proxies to SLE sentinel SNP  
320 rs1150757 and rs9462027, respectively. These SNPs in TFH open chromatin were found  
321 in contact with *LSM2* and *SNRPC* (**Supplemental Figure 6**), 35 to 150 kb away. Both of  
322 these genes encode proteins that participate in the processing of nuclear precursor  
323 messenger RNA splicing, and are frequently the targets of autoantibodies produced by  
324 patients with SLE<sup>27,28</sup>.

325 Ontology of the set of genes found physically connected to open SLE variants showed  
326 enrichment for pathways involved in dendritic cell maturation, T-B cell interactions, T  
327 helper differentiation, NFκB signaling, and costimulation through CD28, ICOS, and CD40  
328 (**Figure 7A**). The top three disease networks enriched in SLE SNP-connected genes are  
329 systemic autoimmune disorders, rheumatic disease, and type 1 diabetes, all inflammatory  
330 disorders involving autoantibody-mediated pathology (**Figure 7B**). At least 200 of these



331 connected genes are differentially expressed between naïve and follicular helper T cells  
332 (**Supplemental Tables 2 and 6**), and many have known roles in TFH and/or T cell  
333 function (e.g., *BCL6*, *CXCR5*, *TCF7*, *PRDM1*, *IKZF3*, *IKZF2*, *IRF8*, *ETS1*, *ELF1*, *EBI3*,  
334 *PTPN22*, *PDL1*, *TET3*, *IL19*, *IL20*). Similarly, SLE SNP-connected genes are highly  
335 regulated ( $P < 10^{-6}$ ) in a hierarchical manner by IFN $\gamma$ , IL-2, IL-21, IL-1, IL-27, CD40L, and  
336 TCR/CD28 (**Figure 7C**). We also compared our list of genes found physically associated  
337 with SLE SNPs in TFH with those found statistically associated with SLE variants through  
338 eQTL studies in two distinct human subject cohorts. One study by Odhams *et al.* identified  
339 97 gene-SNP eQTL in B-LCL lines<sup>29</sup>, while another by Bentham *et al.* used B-LCL lines  
340 and undifferentiated leukocyte subsets from peripheral blood to identify 41 SLE eQTL<sup>7</sup>.  
341 Over one-third (14/41) of the SNP-gene associations implicated by the Bentham study  
342 were also identified by our promoter-Capture-C approach in tonsillar TFH cells from three  
343 healthy donors (*ANKS1A*, *C6orf106*, *RMI2*, *SOCS1*, *PXK*, *UHRF1BP1*, *LYST*,  
344 *NADSYN1*, *DHCR7*, *C15orf39*, *MPI*, *CSK*, *ULK3*, *FAM219B*; **Supplemental Figure 7**).  
345 Similarly, 13% (13/97) of the genes implicated by Odhams *et al.* were found connected  
346 to the same SLE SNPs in tonsillar TFH cells (*LYST*, *NADSYN1*, *DHCR7*, *C15orf39*, *MPI*,  
347 *CSK*, *ULK3*, *FAM219B*, *TNIP1*, *CCDC69*, *SPRED2*, *RP11*, **Supplemental Figure 7**), for  
348 a total of 16% (19/119) SNP-gene pairs overlapping between both studies. These results  
349 indicate that a gene's spatial proximity to an accessible, disease-associated SNP in 3D  
350 is a strong predictor of its role in the context of both normal TFH biology and SLE disease  
351 pathogenesis.

352 **Genomic regions identified by SLE GWAS and 3D epigenomics regulate major TFH**  
353 **genes**

354

355 To validate that genomic regions implicated by ATAC-seq, promoter-focused Capture-  
356 C, and SLE-associated genetic variation function as *bona fide* distal regulatory elements  
357 for their connected promoters, we used CRISPR/CAS9 to specifically delete several iOCR  
358 harboring SLE variants from the Jurkat T cell genome. We first targeted the intergenic  
359 region near the *TREH* gene that harbors the rs527619 and rs71041848 proxies to the  
360 rs4639966 SLE sentinel SNP, and was captured interacting with the *CXCR5* promoter  
361 (**Supplemental Figure 8**). Neither untargeted parental Jurkat cells nor a control-targeted  
362 Jurkat line express *CXCR5*, but deletion of this region led to induction of *CXCR5* in  
363 approximately half of the cells (**Figure 8A**). Similarly, parental and control-targeted Jurkat  
364 cells do not express *IKZF1*, which encodes the transcription factor Ikaros, but deletion of  
365 the OCR containing the rs4385425 proxy SNP to the sentinel SLE SNP rs11185603  
366 (**Supplemental Figure 8**) induced expression of Ikaros in nearly half of the cells (**Figure**  
367 **8B**). We also targeted the TFH-specific open chromatin region in the sixth intron of the  
368 *LPP* gene (**Supplemental Figure 8**) that harbors the rs34631447 and rs79044630 SNPs  
369 proxy to sentinel rs6762714 SLE SNP, and was observed interacting with the promoter  
370 of *BCL6*. *BCL6* is not expressed by parental or control-targeted Jurkat cells, but is induced  
371 by IFN-gamma (**Figure 8C**). However, inducible expression of *BCL6* was completely  
372 abrogated in Jurkat cells lacking the ~150 bp SLE-associated *LPP* OCR (**Figure 8C**).  
373 These results confirm that these distal SLE-associated regions, which are located  
374 hundreds to thousands of kilobases away in one dimension, interact with and act as

375 crucial regulatory elements for the genes encoding the master TFH transcription factor  
376 *BCL6*, the *IKZF1* transcriptional repressor, and the TFH chemokine receptor *CXCR5*.  
377 These results indicate that the 3D promoter connectomes detected in these cells reveal  
378 *bona fide* gene regulatory architectures.

379

380 ***SLE-associated open chromatin-promoter connectomes implicate novel genes***  
381 ***involved in TFH function***

382

383 From the set of 243 promoter-connected open SLE variants in TFH cells, we noted a  
384 subset of variants that skipped nearby promoters to interact with genes that are  
385 upregulated upon TFH differentiation, but have no known specific role in TFH biology.  
386 These genes are enriched in canonical pathways such as mannose degradation (*MPI*),  
387 epoxysqualene biosynthesis (*FDFT1*), di- and tri-acylglycerol biosynthesis (*LCLAT1*,  
388 *AGPAT1*), cholesterol biosynthesis (*DHCR7*, *FDFT1*), oxidized GTP/dGTP detoxification  
389 (*DDX6*), breast and lung carcinoma signaling (*ERRBB2*, *HRAS*, *RASSF5*, *CDKN1B*),  
390 tRNA splicing (*TSEN15*, *PDE4A*), pentose phosphate pathway (*TALDO1*), acetyl-coA  
391 biosynthesis (*PDHB*), dolichyl-diphosphooligosaccharide biosynthesis (*DPAGT1*), and  
392 valine degradation (*HIBADH*). Two of these genes, *HIPK1* and *MINK1* (**Figure 9A**),  
393 encode a homeobox-interacting kinase and a MAP3/4K homolog that each regulate gene  
394 expression in other cell types<sup>30,31</sup>. Like many genes in this category, both *HIPK1* and  
395 *MINK1* are upregulated in TFH, and their promoters interact with OCR that are genetically  
396 associated with SLE risk, suggesting they are involved in TFH function. To test this, we  
397 transduced TFH differentiated *in vitro* from naïve CD4<sup>+</sup> T cells<sup>32</sup> (**Figure 9B and C**) with

398 a lentiviral vector expressing shRNA targeting the *HIPK1* transcript to knock down HIPK1  
399 expression (**Figure 9D**), or with scrambled or *B2M* shRNA as controls (**Supplemental**  
400 **Figure 9**). GFP<sup>+</sup> cells were sorted, restimulated with CD3/28 beads, and secretion of IL-  
401 21, the major cytokine required for T cell help for B cell antibody production, was  
402 measured in the supernatant by ELISA. Remarkably, targeting of HIPK1 expression had  
403 no effect on *in vitro* TFH differentiation as measured by induction of BCL6, PD-1 or  
404 CXCR5 (**Supplemental Figure 9**), but resulted in a ~3-fold decrease in IL-21 production  
405 (**Figure 9E**). To determine if pharmacologic targeting of HIPK1 can also modulate TFH  
406 function, we treated *in vitro* differentiated TFH with the HIPK1/2 inhibitor A64. As with  
407 genetic targeting, pharmacologic inhibition of HIPK activity resulted in a dose-dependent  
408 reduction in IL-21 production by activated TFH cells (**Figure 9F**) without effecting  
409 proliferation, viability, or differentiation (**Supplemental Figure 9**). As a further test of  
410 whether SLE-associated promoter-OCR connectomes can reveal novel drug targets for  
411 TFH function, we targeted MINK1 pharmacologically with the MAP3/4K antagonist  
412 PF06260933. Treatment with this inhibitor resulted in a dose-dependent reduction in IL-  
413 21 secretion by TFH cells, with an ED<sub>50</sub> of 5 nM (**Figure 9G**). Unlike the HIPK1 inhibitor,  
414 this MINK1 inhibitor did impact T cell IL-2 production and proliferation, but with an ED<sub>50</sub>  
415 8- to 10-fold higher than its effect on IL-21 production (**Supplemental Figure 9**). These  
416 data show that integrated, 3-dimensional maps of disease-associated genetic variation,  
417 open chromatin, and promoter connectomes can lead to *bona fide* novel drug targets that  
418 control tissue-specific and SLE-relevant biology.

## 419 **DISCUSSION**

420

421 In this study, we used systems-level integration of disease-associated genetic  
422 variation and 3-dimensional epigenomic maps of the interactions between open  
423 chromatin and promoters in a highly disease-relevant tissue to identify putative disease-  
424 associated regulatory regions and the genes they influence. Importantly, this study does  
425 not aim to measure the impact of SLE-associated genetic variation on chromatin  
426 accessibility or promoter interactions, and therefore does not require large sample sizes  
427 from SLE patients and normal individuals. Rather, we use the location of reported,  
428 potentially causal SLE variants as 'signposts' to identify long-range open chromatin  
429 elements that may regulate SLE-relevant gene expression in the context of normal  
430 follicular helper T cell biology.

431 Our one-dimensional open chromatin analyses demonstrated a strong correlation  
432 between promoter accessibility and differential gene expression in human tonsillar naive  
433 vs. follicular helper T cells. These analyses also showed that SLE-associated variants in  
434 accessible promoters in TFH generally coincide with highly expressed genes enriched in  
435 autoimmune disease pathways, suggesting that TFH open chromatin landscapes  
436 represent a useful filter through which functional, systemic autoimmune disease-  
437 associated variants can be identified out of the thousands of sentinel and proxy SNPs to  
438 the sentinel signals implicated by GWAS.

439 However, only 20% of OCR are located in promoter regions, while 80% of the open  
440 chromatin regions in human naive and follicular helper T cells map to non-coding/non-  
441 promoter regions of the genome, making an interpretation of the potential regulatory role  
442 of these regions challenging. To overcome this problem, we generated high-resolution,

443 comprehensive maps of the open chromatin-promoter connectome in naive and TFH  
444 cells, allowing physical assignment of non-coding OCR and SNPs to genes, and revealing  
445 the potential regulatory architectures of nearly all coding genes and over half of non-  
446 coding genes in human immune cell types with crucial roles in humoral immunity and  
447 systemic immunopathology. Similar to previous promoter interactome studies<sup>33</sup>, we found  
448 that promoter-interacting regions are enriched for open chromatin and the chromatin-  
449 based signatures of enhancers. However, we also found that open chromatin regions that  
450 interact with a promoter are enriched over 10-fold for enhancer marks compared to OCR  
451 that are not connected to a promoter, suggesting that promoter-focused Capture-C  
452 preferentially identifies non-coding regions with gene regulatory activity. We also  
453 observed enrichment of enhancer marks at open promoters engaged in promoter-  
454 promoter interactions compared to promoters not connected to another promoter,  
455 suggesting that promoters may synergize in three dimensions in an enhancer-like manner  
456 to augment expression of their connected genes<sup>34</sup>.

457 Our study shows that, similar to previous estimates<sup>35</sup>, less than 10% of promoter  
458 interactions exclusively involve the nearest genes. Over 90% of accessible disease  
459 variants interact with distant genes, and that over 60% of open variants skip the nearest  
460 gene altogether and exclusively interact only with distant genes. Importantly, we were  
461 able to validate direct roles for several SLE-associated distal OCR in the regulation of  
462 their connected genes (*BCL6*, *CXCR5*, *IKZF1*) using CRISPR/CAS9-mediated editing in  
463 human T cells, suggesting that SLE-associated genetic variation at distant loci can  
464 operate through effects on genes with known roles in TFH and/or SLE biology. A locus  
465 control region ~130 kb upstream of the *BCL6* gene has been defined previously in

466 germinal center B cells<sup>36</sup>, and we also find evidence for usage of this region by human  
467 TFH cells at the level of open chromatin, histone enhancer marks, and long-range  
468 connectivity to the *BCL6* promoter (**Supplemental Figure 10**). However, we also observe  
469 a much more distant ‘stretch’ enhancer within the *LPP* gene in TFH cells, as evidenced  
470 by extensive open chromatin, H3K27 acetylation, and H3K4 mono-methylation  
471 (**Supplemental Figure 10**). This region shows extensive connectivity with *BCL6* in the  
472 3D architecture of the nucleus, and the 1 Mb distal SLE-associated *BCL6* enhancer  
473 validated by genome editing in this study is contained within this *BCL6* stretch enhancer.  
474 This enhancer region is occupied in lymphoid cell lines by NFkB/RelA and POU2F2, both  
475 transcription factors known to positively regulate immunoglobulin and inflammatory gene  
476 expression (ENCODE). Long-range regulatory elements for *CXCR5* have not been  
477 previously identified, and the -180 kb SLE-associated element in this study is the first  
478 validated for *CXCR5*. Deletion of this element led to increased expression of *CXCR5*,  
479 suggesting that unlike the distal *BCL6-LPP* enhancer, this element is a silencer in Jurkat  
480 cells. Consistent with this finding, this region is occupied by the repressive transcription  
481 factors YY1, BHLHE40 and BATF in lymphoid cells (ENCODE), but its function in primary  
482 TFH cells remains to be determined. These distant SNP-gene regulatory pairs join  
483 examples like the *FTO* and *TCF7L2* loci<sup>1,3</sup>, in which GWAS data were interpreted to  
484 implicate the nearest genes, while 3D epigenomics and functional follow-up showed that  
485 the disease variants actually reside in elements that regulate the distant *IRX3* gene (for  
486 *FTO*) and the *ACSL5* gene (for *TCF7L2*). Our results indicate that a gene’s spatial  
487 proximity in three dimensions to a regulatory SLE SNP is a strong predictor of its function  
488 in the context of TFH biology and SLE disease pathogenesis, and suggest that

489 assumptions that a given genomic feature (*e.g.*, SNP or TF binding motif) or epigenomic  
490 feature (*e.g.*, 5meCpG, 5hmCpG, or histone mark) identified by 1D mapping of the human  
491 genome regulates the nearest gene are more likely to be incorrect than correct. These  
492 data have important implications for the interpretation of all genetic and epigenomic  
493 studies in all tissues.

494 Remarkably, our integrated open chromatin and promoter connectome mapping in  
495 tonsillar TFH cells from three healthy individuals identified one-third of the SNP-gene  
496 pairs identified by Bentham<sup>7</sup>, and 13% of the SNP-gene pairs identified by Odhams<sup>29</sup>.  
497 These quantitative trait studies require samples from hundreds of individuals, and the  
498 data are obtained from blood, B-LCL, or naïve mononuclear leukocytes. However,  
499 immune responses do not take place in the blood, and the pathophysiologic aspects of  
500 inflammatory disease are mediated by specialized, differentiated immune cell types that  
501 are rare or not present in blood. Our approach utilized human follicular helper T cells from  
502 tonsil that are ‘caught in the act’ of mediating coordinated *in vivo* T-B immune responses,  
503 and is the same cell type involved in B cell help for autoantibody production in SLE. In  
504 addition, this variant-to-gene mapping approach identified ~10-fold more SLE SNP-gene  
505 association than current eQTL studies; further follow up work will determine how many of  
506 these associations are valid vs. false positives.

507 In addition to revealing the previously unknown SLE-associated regulatory  
508 architectures of known TFH/SLE genes, we show that the combination of GWAS and 3-  
509 dimensional epigenomics can identify genes with previously unappreciated roles in  
510 disease biology through their connections with accessible disease SNPs. In a previous  
511 study, we implicated the novel gene *ING3* by virtue of its interaction with an accessible



512 osteoporosis-associated SNP, and showed that this gene is required for osteoclast  
513 differentiation in an *in vitro* model<sup>14</sup>. In this current study, approximately two dozen ‘novel’  
514 genes up- or down-regulated during differentiation of naive CD4+ T cells into TFH were  
515 implicated through their connection to SLE SNPs. Among these are *HIPK1*, a nuclear  
516 homeobox-interacting protein kinase that cooperates with homeobox, p53, and  
517 TGFβ/Wnt pathway transcription factors to regulate gene transcription<sup>30,37–39</sup>. A role for  
518 HIPK1 in T-independent B cell responses has been identified in the mouse<sup>40</sup>, but no role for  
519 this kinase has been previously established in TFH or SLE. Another gene implicated in  
520 our study is *MINK1*, which encodes the misshapen-like kinase MAP4K6. This kinase  
521 functions upstream of JNK and SMAD in neurons<sup>41,42</sup>, and has been shown to inhibit  
522 TGFβ-induced Th17 differentiation<sup>43</sup>. However, a role in TFH or SLE has likewise not  
523 been previously appreciated. We show that genetic and/or pharmacologic targeting of  
524 HIPK1 or MINK1 in human TFH cells inhibits their production of IL-21, a cytokine required  
525 for T cell-mediated help for B cell antibody production<sup>44</sup>. While further work is required to  
526 elucidate the role of these kinases in TFH biology and the pathogenesis of systemic  
527 autoimmunity, these examples show the utility of this integrated approach in identifying  
528 novel targets for drug repurposing or new compound development in complex heritable  
529 diseases.

## 530 **METHODS**

531

### 532 **Purification of naïve and follicular helper T cells from human tonsil**

533 Fresh tonsils were obtained from immune-competent children (n=10) undergoing  
534 tonsillectomy to address airway obstruction or a history of recurrent tonsillitis. The mean  
535 age of donors was 5.7 years (range 2-16 years) and 50% were male. Tonsillar  
536 mononuclear cells were isolated from tissues by mechanical disruption (tonsils were  
537 minced and pressed through a 70 micron cell screen) followed by Ficoll-Paque  
538 centrifugation. CD19-positive cells were removed (StemCell) and CD4<sup>+</sup> T cells were  
539 enriched with magnetic beads (Biolegend) prior to sorting naïve T cells (CD4<sup>+</sup>CD45RO<sup>-</sup>)  
540 and T follicular helper cells (CD4<sup>+</sup>CD45RO<sup>+</sup>CD25<sup>lo</sup>CXCR5<sup>hi</sup>PD1<sup>hi</sup>) on a MoFlo Astrios EQ  
541 (Beckman Coulter).

542

### 543 **Cell fixation**

544 We used standard methods for cell fixation<sup>14</sup>. Briefly, 10<sup>7</sup> TFH or naïve CD4<sup>+</sup> T cells  
545 were suspended in 10 mL RPMI + 10% FBS, followed by an additional 270uL of 37%  
546 formaldehyde and incubation for 10 min at RT on a platform rocker. The fixation reaction  
547 was quenched by the addition of 1.5 mL cold 1M glycine (4°C). Fixed cells were  
548 centrifuged at 1000 rpm for 5 min at 4°C and supernatants were removed. The cell pellets  
549 were washed in 10 ml cold PBS (4°C) followed by centrifugation as above. Cell pellets  
550 were resuspended in 5 ml cold lysis buffer (10 mM Tris pH8, 10 mM NaCl, 0.2% NP-  
551 40/Igepal supplemented with a protease inhibitor cocktail). Resuspended cell pellets  
552 were incubated for 20 minutes on ice, centrifuged at 1800 rpm, and lysis buffer was

553 removed. Cell pellets were resuspended in 1 mL of fresh lysis buffer, transferred to 1.5  
554 mL Eppendorf tubes, and snap frozen in ethanol/dry ice or liquid nitrogen. Frozen cell  
555 pellets were stored at -80°C for 3C library generation.

556

### 557 **3C library generation**

558 We used standard methods for generation of 3C libraries<sup>14</sup>. For each library, 10<sup>7</sup> fixed  
559 cells were thawed at 37°C, followed by centrifugation at RT for 5 mins at 14,000rpm. The  
560 cell pellet was resuspended in 1 mL of dH<sub>2</sub>O supplemented with 5 uL 200X protease  
561 inhibitor cocktail, incubated on ice for 10 mins, then centrifuged. Cell pellet was  
562 resuspended to a total volume of 650 uL in dH<sub>2</sub>O. 50 uL of cell suspension was set aside  
563 for pre-digestion QC, and the remaining sample was divided into 3 tubes. Both pre-  
564 digestion controls and samples underwent a pre-digestion incubation in a Thermomixer  
565 (BenchMark) with the addition of 0.3%SDS, 1x NEB DpnII restriction buffer, and dH<sub>2</sub>O  
566 for 1hr at 37°C shaking at 1,000rpm. A 1.7% solution of Triton X-100 was added to each  
567 tube and shaking was continued for another hour. After pre-digestion incubation, 10 ul of  
568 DpnII (NEB, 50 U/μL) was added to each sample tube only, and continued shaking along  
569 with pre-digestion control until the end of the day. An additional 10 μL of DpnII was added  
570 to each digestion reaction and digested overnight. The next day, a further 10 μL DpnII  
571 was added and continue shaking for another 2-3 hours. 100 uL of each digestion reaction  
572 was then removed, pooled into one 1.5 mL tube, and set aside for digestion efficiency  
573 QC. The remaining samples were heat inactivated incubated at 1000 rpm in a MultiTherm  
574 for 20 min at 65°C to inactivate the DpnII, and cooled on ice for 20 additional minutes.  
575 Digested samples were ligated with 8 uL of T4 DNA ligase (HC ThermoFisher, 30 U/μL)

576 and 1X ligase buffer at 1,000 rpm overnight at 16°C in a MultiTherm. The next day, an  
577 additional 2 µL of T4 DNA ligase was spiked in to each sample and incubated for another  
578 few hours. The ligated samples were then de-crosslinked overnight at 65°C with  
579 Proteinase K (20 mg/mL, Denville Scientific) along with pre-digestion and digestion  
580 control. The following morning, both controls and ligated samples were incubated for 30  
581 min at 37°C with RNase A (Millipore), followed by phenol/chloroform extraction, ethanol  
582 precipitation at -20°C, the 3C libraries were centrifuged at 3000 rpm for 45 min at 4°C to  
583 pellet the samples. The controls were centrifuged at 14,000 rpm. The pellets were  
584 resuspended in 70% ethanol and centrifuged as described above. The pellets of 3C  
585 libraries and controls were resuspended in 300µL and 20µL dH<sub>2</sub>O, respectively, and  
586 stored at -20°C. Sample concentrations were measured by Qubit. Digestion and ligation  
587 efficiencies were assessed by gel electrophoresis on a 0.9% agarose gel and also by  
588 quantitative PCR (SYBR green, Thermo Fisher).

589

### 590 **Promoter-Capture-C design**

591 Our promoter-Capture-C approach was designed to leverage the four-cutter restriction  
592 enzyme *DpnII* in order to give high resolution restriction fragments of a median of  
593 ~250bp<sup>14</sup>. This approach also allows for scalable resolution through *in silico* fragment  
594 concatenation (**Supplemental Table 4**). Custom capture baits were designed using  
595 Agilent SureSelect RNA probes targeting both ends of the *DpnII* restriction fragments  
596 containing promoters for coding mRNA, non-coding RNA, antisense RNA, snRNA,  
597 miRNA, snoRNA, and lincRNA transcripts (UCSC lincRNA transcripts and sno/miRNA  
598 under GRCh37/hg19 assembly) totaling 36,691 RNA baited fragments through the

599 genome<sup>14</sup>. In this study, the capture library was re-annotated under gencodeV19 at both  
600 1-fragment and 4-fragment resolution, and is successful in capturing 89% of all coding  
601 genes and 57% of noncoding RNA gene types. The missing coding genes could not be  
602 targeted due to duplication or highly repetitive DNA sequences in their promoter regions.

603

#### 604 **Promoter-Capture-C assay**

605 Isolated DNA from 3C libraries was quantified using a Qubit fluorometer (Life  
606 technologies), and 10 µg of each library was sheared in dH<sub>2</sub>O using a QSonica Q800R  
607 to an average fragment size of 350bp. QSonica settings used were 60% amplitude, 30s  
608 on, 30s off, 2 min intervals, for a total of 5 intervals at 4 °C. After shearing, DNA was  
609 purified using AMPureXP beads (Agencourt). DNA size was assessed on a Bioanalyzer  
610 2100 using a DNA 1000 Chip (Agilent) and DNA concentration was checked via Qubit.  
611 SureSelect XT library prep kits (Agilent) were used to repair DNA ends and for adaptor  
612 ligation following the manufacturer protocol. Excess adaptors were removed using  
613 AMPureXP beads. Size and concentration were checked by Bioanalyzer using a DNA  
614 1000 Chip and by Qubit fluorometer before hybridization. One microgram of adaptor-  
615 ligated library was used as input for the SureSelect XT capture kit using manufacturer  
616 protocol and our custom-designed 41K promoter Capture-C library. The quantity and  
617 quality of the captured library was assessed by Bioanalyzer using a high sensitivity DNA  
618 Chip and by Qubit fluorometer. SureSelect XT libraries were then paired-end sequenced  
619 on 8 lanes of Illumina Hiseq 4000 platform (100 bp read length).

620

#### 621 **ATAC-seq library generation**

622 A total of 50,000 to 100,000 sorted tonsillar naive or follicular helper T cells were  
623 centrifuged at 550g for 5 min at 4°C. The cell pellet was washed with cold PBS and  
624 resuspended in 50 µL cold lysis buffer (10 mM Tris-HCl, pH 7.4, 10 mM NaCl, 3 mM  
625 MgCl<sub>2</sub>, 0.1% NP-40/IGEPAL CA-630) and immediately centrifuged at 550g for 10 min at  
626 4°C. Nuclei were resuspended in the Nextera transposition reaction mix (25 ul 2x TD  
627 Buffer, 2.5 uL Nextera Tn5 transposase (Illumina Cat #FC-121-1030), and 22.5 ul  
628 nuclease free H<sub>2</sub>O) on ice, then incubated for 45 min at 37°C. The tagmented DNA was  
629 then purified using the Qiagen MinElute kit eluted with 10.5 µL Elution Buffer (EB). Ten  
630 microliters of purified tagmented DNA was PCR amplified using Nextera primers for 12  
631 cycles to generate each library. PCR reaction was subsequently cleaned up using 1.5x  
632 AMPureXP beads (Agencourt), and concentrations were measured by Qubit. Libraries  
633 were paired-end sequenced on the Illumina HiSeq 4000 platform (100 bp read length).

634

### 635 **ATAC-seq analysis**

636 TFH and naïve ATAC-seq peaks were called using the ENCODE ATAC-seq pipeline  
637 (<https://www.encodeproject.org/atac-seq/>). Briefly, pair-end reads from three biological  
638 replicates for each cell type were aligned to hg19 genome using bowtie2, and duplicate  
639 reads were removed from the alignment. Narrow peaks were called independently for  
640 each replicate using macs2 (-p 0.01 --nomodel --shift -75 --extsize 150 -B --SPMR --keep-  
641 dup all --call-summits) and ENCODE blacklist regions (ENCSR636HFF) were removed  
642 from peaks in individual replicates. Peaks from all replicates were merged by bedtools  
643 (v2.25.0) within each cell type and the merged peaks present in less than two biological  
644 replicates were removed from further analysis. Finally, ATAC-seq peaks from both cell

645 types were merged to obtain reference open chromatin regions. To determine whether  
646 an OCR is present in TFH and/or naïve cells, we first intersected peaks identified from  
647 individual replicates in each cell type with reference OCRs. If any peaks from at least one  
648 replicate overlapped with a given reference OCR, we consider that region is open in the  
649 originating cell type. Quantitative comparisons of TFH and naïve open chromatin  
650 landscapes were performed by evaluating read count differences against the reference  
651 OCR set. De-duplicated read counts for OCR were calculated for each library and  
652 normalized against background (10K bins of genome) using the R package csaw (v 1.8.1).  
653 OCR peaks with less than 1.5 CPM (4.5 ~ 7.5 reads) support in the top 50% of samples  
654 were removed from further differential analysis. Differential analysis was performed  
655 independently using edgeR (v 3.16.5) and limmaVoom (v 3.30.13). Differential OCR  
656 between cell types were called if  $FDR < 0.05$  and absolute  $\log_2$  fold change  $> 1$  in both  
657 methods.

658

### 659 **Promoter-focused Capture-C analysis**

660 Paired-end reads from three biological replicates for naïve and follicular helper T cells  
661 were pre-processed using the HICUP pipeline (v0.5.9) {Wingett:2015}, with bowtie2 as  
662 aligner and hg19 as the reference genome. We were able to detect non-hybrid reads from  
663 all targeted promoters, validating the success of the promoter capture procedure.  
664 Significant promoter interactions at 1-DpnII fragment resolution were called using  
665 CHiCAGO (v1.1.8) {Cairns:2016} with default parameters except for binsize set to 2500.  
666 Significant interactions at 4-DpnII fragment resolution were also called using CHiCAGO  
667 with artificial .baitmap and .rmap files in which DpnII fragments were concatenated *in*

668 *silico* into 4 consecutive fragments using default parameters except for `removeAdjacent`  
669 set to `False`. The significant interactions (CHiCAGO score > 5) from both 1-fragment and  
670 4-fragment resolutions were exported in `.ibed` format and merged into a single file using  
671 custom a PERL script to remove redundant interactions and to keep the max CHiCAGO  
672 score for each interaction. Open chromatin interaction landscapes were established by  
673 projecting significant DpnII fragment interactions at merged 1- and 4-fragment resolutions  
674 to reference OCR (**Figure 3A**). First, DpnII fragments involved in significant interactions  
675 (both “bait” and “other end”) were intersected with reference OCR using `bedtools`  
676 (`v2.25.0`). Interactions between bait and other end OCR pairs were called independently  
677 for each cell type if their overlapped fragments interacted at either resolution and if both  
678 OCR were called as “open” in the corresponding cell type. OCR involved in promoter  
679 interactions (iOCR) were classified as promoter OCR (prOCR) or regulatory OCR  
680 (nonprOCR) by comparing their genomic locations to pre-defined promoter regions (-  
681 1500bp ~ 500bp of TSS) of transcripts in GENCODE V19 and UCSC noncoding RNA  
682 described above. If both ends of an OCR interaction failed to overlap a gene promoter,  
683 that interaction was removed. OCR pair interactions were combined from both cell types  
684 to obtain the reference open chromatin promoter-captured interaction landscapes.

685

### 686 **Microarray analysis of gene expression**

687 RNA from two biological naïve tonsillar CD4+ T cell replicates and four biological tonsillar  
688 TFH replicates were hybridized to Affymetrix Human Clarion S arrays at the CHOP  
689 Nucleic Acid and Protein Core. Data were pre-processed (RMA normalization), and  
690 analyzed for differential expression (DE) using Transcriptome Analysis Console v 4.0 with



691 a false discovery rate (FDR) threshold of 0.05 and a fold-change (FC) threshold of 2. Lists  
692 of differentially expressed genes were generated and ranked by log2 fold change. The  
693 log2 fold change of the genes with significantly differential accessibility at promoter  
694 regions were compared to the pre-ranked gene expression data for GSEA enrichment  
695 analysis.

696

### 697 **Gene set enrichment and Ingenuity pathway analysis**

698 Histone mark and CTCF ChIP-seq datasets for naïve and follicular helper T cells were  
699 obtained from public resources<sup>19-21</sup> and compared to promoter-interacting fragments or  
700 promoter-interacting OCR. Enrichment of promoter-interacted fragments (PIR) for histone  
701 marks and CTCF regions was determined independently in each cell type using the  
702 function `peakEnrichment4Features()` in the CHiCAGO package, and feature enrichment  
703 at promoter-interacting OCR were compared to enrichment at non-promoter-interacting  
704 OCR using the feature enrichment R package LOLA (v1.4.0)<sup>45</sup>. Fisher's exact tests were  
705 performed and odd ratios were plotted for significant enrichment ( $pvalue < 10^{-6}$ ) using  
706 `ggplot2`. The chromatin states of promoter-interacting OCR were also determined using  
707 ChromHMM (v1.17) on binarized bed file of histone marks ChIP-seq peaks with 15 states  
708 for naïve T cells and 6 states for TFH cells. The annotation of chromatin states was  
709 manually added with the reference to epigenome roadmap project<sup>20</sup>. Ingenuity pathway  
710 analysis (IPA, QIAGEN) was used for all the pathway analysis. The top significantly  
711 enriched canonical pathways were plotted using `ggplot2` and networks with relevant  
712 genes were directly exported from IPA.

713

714 **CRISPR/CAS9 genome editing**

715 CRISPR guide RNAs (sgRNA) targeting rs34631447, rs79044630, rs527619,  
716 rs71041848, and rs4385425 were designed using <http://crispr.tefor.net> and cloned into  
717 lentiCRISPRv2-puro or lentiCRISPRv2-mCherry (Feng Zhang, Addgene plasmid #52961;  
718 <http://n2t.net/addgene:52961>; RRID:Addgene\_52961) by golden gate ligation using the  
719 *BsmB1* restriction enzyme (NEB). 293T cells were transfected in DMEM using  
720 Lipofectamine 2000 (Invitrogen) with 6 ug PsPAX2 and 3.5 ug PmD2.G packaging  
721 plasmids and 10 ug empty lentiCRISPRv2 or 10 ug sgRNA-encoding lentiCRISPRv2.  
722 Viral supernatants were collected after 48 hrs for transduction into Jurkat leukemic T cells  
723 maintained in RPMI 1640 with 10% fetal bovine serum, L-glutamine, 2-mercaptoethanol,  
724 and penicillin/streptomycin. Cells were seeded in a 24 well plate at  $0.5 \times 10^6$  in 0.5 mL of  
725 media per well, and 1 mL of viral supernatant with 8 ug/mL of polybrene was added to  
726 each well. Spin-fectation was performed for 90 min. at 2500 rpm and 25°C, and transduced  
727 cells were equilibrated at 37C for 6 hrs. For rs34631447, rs79044630, and rs4385425,  
728 1.2 ml of media was removed and replaced with 1 ml of fresh media containing 1 ug of  
729 puromycin for 7 days of selection before use in experiments. Cells transduced with  
730 sgRNAs targeting rs527619 and rs71041848 were sorted based on mCherry on a FACS  
731 Jazz (BD Biosciences). Mutations were analyzed by PCR coupled with Sanger  
732 sequencing at the CHOP Nucleic Acids and Protein Core. The following primers were  
733 used for PCR: BLC6-F: CTCTGTGGTTGTGGGCAAGGC-  
734 R:CAGGTGGCGAATCAGGACAGG, CXCR5-F: GTCCCTGGTGATGGAAACTCAGGC-  
735 R: GCAGTGGCCTCCCTTACACAGG, IKZF1-F: CCTTCTCCATGCCAGGTGACTC-R:  
736 GGCCTCAGCTAGGCAAACCAGAG. Measurement of BCL-6 expression in targeted

737 Jurkat lines was assessed by flow cytometry using anti-human APC-BCL-6 (Biolegend)  
738 after treatment with human recombinant IFN $\gamma$  (5 ng/mL, R&D Systems) overnight and  
739 stimulation with PMA (30 ng/mL) and ionomycin (1  $\mu$ M, Sigma-Aldrich) for 4-6 hrs.  
740 Expression of Ikaros and CXCR5 by targeted Jurkat lines was also assessed by flow  
741 cytometry using anti-human APC-CXCR5 (Biolegend) and anti-human PE-Ikaros (BD  
742 Biosciences). Fixation, permeabilization and intracellular staining for Ikaros and BCL-6  
743 was performed using the Transcription Factor Buffer Set (BD Pharmingen). Cells were  
744 analyzed on a CytoFLEX flow cytometer (Beckman Coulter).

745

#### 746 **Lentiviral shRNA-based gene targeting**

747 A lentiviral shRNA-based approach was employed to silence the expression of HIPK1 as  
748 well as B2M as a positive control. The lenti-shRNA vectors pGFP-C-shRNA-Lenti-Hipk1,  
749 pGFP-C-shRNA-Lenti-B2M and pGFP-C-scrambled were purchased from Origene. The  
750 packaging vectors PmD2G and PsPAX.2 were obtained from Addgene. Exponentially  
751 growing 293T cells were split and seeded at  $8 \times 10^6$  cells in 100 mm dishes in RPMI 1640  
752 medium at 37C. The following day, cells were transfected in antibiotic- and serum-free  
753 medium with lenti shRNA plus packaging vector DNA prepared in a complex with  
754 Lipofectamine 2000. After 6 hrs of transfection, medium was replaced with complete  
755 serum containing RPMI medium and cells were cultured at 37C for 2 days. Human  
756 primary CD4 $^+$  T cells from healthy donors were obtained from the University of  
757 Pennsylvania Human Immunology Core and stimulated overnight with human anti-CD3-  
758 and anti-CD28-coated microbeads. Cells were harvested, de-beaded, washed with warm  
759 RPMI medium, and aliquots of  $10^6$  activated CD4 $^+$ T cells were infected with 1 ml of viral

760 supernatant collected from lenti-shRNA transfected 293T cell cultures. Polybrene was  
761 added to the viral supernatant at 8 ug/ml, cells were spin-fected at 2500 rpm for 1.5 hrs,  
762 cultured at 37C for 6 hrs, and restimulated with anti-CD3 and anti-CD28 beads, Activin A  
763 (100 ng/ml), IL-12 (5 ng/ml), and anti-IL-2 (2 ug/ml) to induce *in vitro* TFH differentiation  
764 {Locci;2016}. After 4 days of differentiation, transduced cells were FACS-sorted based on  
765 GFP expression, and expression of B2M, BCL-6, CXCR5 and PD-1 was measured by  
766 flow cytometry. In addition, sorted GFP+ *in vitro* TFH cells were restimulated with plate-  
767 bound human anti-CD3 and anti-CD28 (1 ug/ml each) in flat bottom 96 well plates, and  
768 supernatants were collected at the indicated timepoints for assessment of IL-21 secretion  
769 by ELISA. RNA was extracted from sorted GFP+ TFH cells using an RNeasy micro kit  
770 (Qiagen), treated with DNase, and 500 ng of total RNA was reverse-transcribed using  
771 iScript cDNA synthesis kit (Bio-Rad). qRT-PCR quantification of HIPK-1, B2M and 18s  
772 rRNA transcripts was performed using Amplitaq Gold SYBR Master mix (ABI) on Applied  
773 Biosystems step one plus real- time thermocycler. Specific mRNA levels were determined  
774 as ratio of total 18s rRNA. The following primer sequences were used for qRT PCR: HIPK-  
775 1-F: CAGTCAGGAGTTCTCACGCA, HIPK-1-R: TGGCTACTTGAGGGTGGAGA, B2M-  
776 F: GCCGTGTGAACCATGTGACT, B2M-R: CATCCAATCCAAATGCGGCA, hu 18S-F:  
777 CCTTTAACGAGGATCCATTGGA, hu 18S-R: CGCTATTGGAGCTGGAATTACC.

778

### 779 **Pharmacologic inhibitors**

780 The HIPK kinase family inhibitor A64 trifluoroacetate was purchased from Sigma, and the  
781 MAP4K2 inhibitor PF06260933, which also inhibits MINK1 and TNIK, was purchased from  
782 TOCRIS. Human primary CD4+ T cells were cultured under TFH condition for 5 days in  
783 the presence of the indicated concentrations of each inhibitor (150 nM to 2500 nM for

784 A64, 3.7 nM to 100 nM for PF06260933). In addition, anti-CD3- and anti-CD28-stimulated  
785 human CD4+ T cells (non-TFH) were cultured in the presence of inhibitors. After 5 days  
786 of primary culture, cells were harvested and  $10^6$  cells were restimulated with plate-bound  
787 human anti-CD3+ anti-CD28 (1 ug/ml each) in the presence of inhibitors. Culture  
788 supernatants were collected at the indicated timepoints for measurement of IL-2 and IL-  
789 21 by ELISA (eBioscience).

790

791

### 792 **Data availability**

793 Our data are available from ArrayExpress (<https://www.ebi.ac.uk/arrayexpress/>) with  
794 accession numbers E-MTAB-6621 (promoter-Capture-C), E-MTAB-6617 (ATAC-seq),  
795 and E-MTAB-6637(expression microarray) respectively.

796

797 **SUPPLEMENTAL TABLE 1.** Reference ATAC-seq peaks in naive and TFH cells.

798

799 **SUPPLEMENTAL TABLE 2.** Microarray-based gene expression analysis.

800

801 **SUPPLEMENTAL TABLE 3.** OCR harboring SLE proxy SNPs.

802

803 **SUPPLEMENTAL TABLE 4.** Summary of 1- and 4-fragment-based promoter interaction  
804 calls.

805

806 **SUPPLEMENTAL TABLE 5.** Summary of OCR-based promoter interaction calls.

807

808 **SUPPLEMENTAL TABLE 6.** SLE variant-to-gene mapping using promoter-OCR  
809 connectomes in follicular helper T cells.

810 **REFERENCES**

- 811 1. Smemo, S. *et al.* Obesity-associated variants within FTO form long-range functional  
812 connections with IRX3. *Nature* **507**, 371–375 (2014).
- 813 2. Claussnitzer, M. *et al.* FTO Obesity Variant Circuitry and Adipocyte Browning in  
814 Humans. *New Engl J Medicine* **373**, 895–907 (2015).
- 815 3. Xia, Q. *et al.* The type 2 diabetes presumed causal variant within TCF7L2 resides in  
816 an element that controls the expression of ACSL5. *Diabetologia* **59**, 2360–2368 (2016).
- 817 4. Tsokos, G. C., Lo, M. S., Reis, P. & Sullivan, K. E. New insights into the  
818 immunopathogenesis of systemic lupus erythematosus. *Nat Rev Rheumatol* **12**, 716  
819 730 (2016).
- 820 5. Song, W. & Craft, J. T follicular helper cell heterogeneity: Time, space, and function.  
821 *Immunol Rev* **288**, 85–96 (2019).
- 822 6. Crotty, S. Follicular Helper CD4 T Cells (TFH). *Annu Rev Immunol* **29**, 621–663  
823 (2011).
- 824 7. Bentham, J. *et al.* Genetic association analyses implicate aberrant regulation of  
825 innate and adaptive immunity genes in the pathogenesis of systemic lupus  
826 erythematosus. *Nat Genet* **47**, 1457–1464 (2015).
- 827 8. Morris, D. L. *et al.* Genome-wide association meta-analysis in Chinese and European  
828 individuals identifies ten new loci associated with systemic lupus erythematosus. *Nat*  
829 *Genet* **48**, 940–946 (2016).
- 830 9. Thurman, R. E. *et al.* The accessible chromatin landscape of the human genome.  
831 *Nature* **489**, 75 (2012).
- 832 10. Romberg, N. *et al.* COVID-associated TAC1 mutations affect autoreactive B cell

- 833 selection and activation. *J Clin Invest* **123**, 4283–4293 (2013).
- 834 11. Buenrostro, J. D., Giresi, P. G., Zaba, L. C., Chang, H. Y. & Greenleaf, W. J.  
835 Transposition of native chromatin for fast and sensitive epigenomic profiling of open  
836 chromatin, DNA-binding proteins and nucleosome position. *Nat Methods* **10**, 1213–1218  
837 (2013).
- 838 12. Adorini, L. & Penna, G. Control of autoimmune diseases by the vitamin D endocrine  
839 system. *Nat Clin Pract Rheum* **4**, 404–412 (2008).
- 840 13. Hughes, J. R. *et al.* Analysis of hundreds of cis-regulatory landscapes at high  
841 resolution in a single, high-throughput experiment. *Nat Genet* **46**, 205–212 (2014).
- 842 14. Chesi, A. *et al.* Genome-scale Capture C promoter interactions implicate effector  
843 genes at GWAS loci for bone mineral density. *Nat Commun* **10**, 1260 (2019).
- 844 15. Wingett, S. *et al.* HiCUP: pipeline for mapping and processing Hi-C data.  
845 *F1000research* **4**, 1310 (2015).
- 846 16. Cairns, J. *et al.* CHiCAGO: robust detection of DNA looping interactions in Capture  
847 Hi-C data. *Genome Biol* **17**, 127 (2016).
- 848 17. Javierre, B. M. *et al.* Lineage-Specific Genome Architecture Links Enhancers and  
849 Non-coding Disease Variants to Target Gene Promoters. *Cell* **167**, 1369–1384.e19  
850 (2016).
- 851 18. Ernst, J. *et al.* Mapping and analysis of chromatin state dynamics in nine human cell  
852 types. *Nature* **473**, 43–49 (2011).
- 853 19. Weinstein, J. S. *et al.* Global transcriptome analysis and enhancer landscape of  
854 human primary T follicular helper and T effector lymphocytes. *Blood* **124**, 3719–3729  
855 (2014).



- 856 20. Bernstein, B. E. *et al.* The NIH Roadmap Epigenomics Mapping Consortium. *Nat*  
857 *Biotechnol* **28**, 1045 (2010).
- 858 21. Cuddapah, S. *et al.* Global analysis of the insulator binding protein CTCF in  
859 chromatin barrier regions reveals demarcation of active and repressive domains.  
860 *Genome Res* **19**, 24–32 (2009).
- 861 22. Johnston, R. J. *et al.* Bcl6 and Blimp-1 Are Reciprocal and Antagonistic Regulators  
862 of T Follicular Helper Cell Differentiation. *Science* **325**, 1006–1010 (2009).
- 863 23. Kroenke, M. A. *et al.* Bcl6 and Maf Cooperate To Instruct Human Follicular Helper  
864 CD4 T Cell Differentiation. *J Immunol* **188**, 3734–3744 (2012).
- 865 24. Hatzi, K. *et al.* BCL6 orchestrates Tfh cell differentiation via multiple distinct  
866 mechanisms. *J Exp Medicine* **212**, 539–553 (2015).
- 867 25. Liu, X. *et al.* Genome-wide Analysis Identifies Bcl6-Controlled Regulatory Networks  
868 during T Follicular Helper Cell Differentiation. *Cell Reports* **14**, 1735–1747 (2016).
- 869 26. Liu, X. *et al.* Bcl6 expression specifies the T follicular helper cell program in vivo. *J*  
870 *Exp Medicine* **209**, 1841–1852 (2012).
- 871 27. Eystathioy, T., Peebles, C. L., Hamel, J. C., Vaughn, J. H. & Chan, E. K.  
872 Autoantibody to hLSm4 and the heptameric LSm complex in anti-Sm sera. *Arthritis*  
873 *Rheumatism* **46**, 726–734 (2002).
- 874 28. Gunnewiek, K. J., van de Putte, L. & van Venrooij, W. The U1 snRNP complex: an  
875 autoantigen in connective tissue diseases. An update. *Clin Exp Rheumatol* **15**, 549–60  
876 (1997).
- 877 29. Odhams, C. A. *et al.* Mapping eQTLs with RNA-seq reveals novel susceptibility  
878 genes, non-coding RNAs and alternative-splicing events in systemic lupus

- 879 erythematosus. *Hum Mol Genet* **26**, 1003–1017 (2017).
- 880 30. Kim, Y., Choi, C., Lee, S., Conti, M. & Kim, Y. Homeodomain-interacting protein  
881 kinases, a novel family of co-repressors for homeodomain transcription factors. *J Biol*  
882 *Chem* **273**, 25875–25879 (1998).
- 883 31. Nicke, B. *et al.* Involvement of MINK, a Ste20 Family Kinase, in Ras Oncogene-  
884 Induced Growth Arrest in Human Ovarian Surface Epithelial Cells. *Mol Cell* **20**, 673–685  
885 (2005).
- 886 32. Locci, M. *et al.* Activin A programs the differentiation of human TFH cells. *Nat*  
887 *Immunol* **17**, 976–984 (2016).
- 888 33. Rubin, A. J. *et al.* Lineage-specific dynamic and pre-established enhancer-promoter  
889 contacts cooperate in terminal differentiation. *Nat Genet* **49**, (2017).
- 890 34. o, L. T. *et al.* Genome-wide characterization of mammalian promoters with distal  
891 enhancer functions. *Nat Genet* **49**, 1073–1081 (2017).
- 892 35. Sanyal, A., Lajoie, B. R., Jain, G. & Dekker, J. The long-range interaction landscape  
893 of gene promoters. *Nature* **489**, 109 (2012).
- 894 36. Bunting, K. L. *et al.* Multi-tiered Reorganization of the Genome during B Cell Affinity  
895 Maturation Anchored by a Germinal Center-Specific Locus Control Region. *Immunity*  
896 **45**, 497–512 (2016).
- 897 37. Kondo, S. *et al.* Characterization of cells and gene-targeted mice deficient for the  
898 p53-binding kinase homeodomain-interacting protein kinase 1 (HIPK1). *Proc National*  
899 *Acad Sci* **100**, 5431–5436 (2003).
- 900 38. Louie, S. H. *et al.* Modulation of the beta-catenin signaling pathway by the  
901 dishevelled-associated protein Hipk1. *Plos One* **4**, e4310 (2009).

- 902 39. Shang, Y. *et al.* Transcriptional corepressors HIPK1 and HIPK2 control  
903 angiogenesis via TGF- $\beta$ -TAK1-dependent mechanism. *Plos Biol* **11**, e1001527 (2013).
- 904 40. Guerra, F. M., Gommerman, J. L., Corfe, S. A., Paige, C. J. & Rottapel, R.  
905 Homeodomain-Interacting Protein Kinase (HIPK)-1 Is Required for Splenic B Cell  
906 Homeostasis and Optimal T-Independent Type 2 Humoral Response. *Plos One* **7**,  
907 e35533 (2012).
- 908 41. Larhammar, M., Huntwork-Rodriguez, S., Rudhard, Y., Sengupta-Ghosh, A. &  
909 Lewcock, J. W. The Ste20 Family Kinases MAP4K4, MINK1, and TNIK Converge to  
910 Regulate Stress-Induced JNK Signaling in Neurons. *J Neurosci* **37**, 11074–11084  
911 (2017).
- 912 42. Kaneko, S. *et al.* Smad inhibition by the Ste20 kinase Misshapen. *Proc National*  
913 *Acad Sci* **108**, 11127–11132 (2011).
- 914 43. Fu, G. *et al.* Suppression of Th17 cell differentiation by misshapen/NIK-related  
915 kinase MINK1. *J Exp Med* **214**, jem.20161120 (2017).
- 916 44. Ozaki, K. *et al.* A Critical Role for IL-21 in Regulating Immunoglobulin Production.  
917 *Science* **298**, 1630–1634 (2002).
- 918 45. Sheffield, N. C. & Bock, C. LOLA: enrichment analysis for genomic region sets and  
919 regulatory elements in R and Bioconductor. *Bioinformatics* **32**, 587–589 (2016).

920 **Acknowledgements**

921  
922 This work was supported by The Center for Spatial and Functional Genomics at The  
923 Children's Hospital of Philadelphia (ADW and SFG), the Daniel B. Burke Endowed Chair  
924 for Diabetes Research (SFG), the Jeffrey Modell Foundation (NR), and NIH grants  
925 AI123539 (ADW), DK122586 (ADW, SFG), HG010067 (SFG), AI146026 (NR), and  
926 AI115001 (NR).

927

928

929 **Author Contributions**

930

931 C.S. assisted with preparation of the manuscript and conducted the epigenomic and  
932 transcriptomic analyses with the help of E.M.; A.C. designed the custom Capture-C  
933 promoter probe set; C.L.C. provided human tonsillar T cells, N.R. contributed to the  
934 design of the immunologic studies and provided microarray data; M.E.J, M.E.L, S.L.,  
935 K.M.H, and J.P. generated and sequenced the epigenomic libraries; A.T., R.M.T. and  
936 P.S. performed the CRISPR/CAS, shRNA and pharmacologic targeting experiments;  
937 S.F.G. directed the genomic and epigenomic studies; A.D.W. directed the epigenomic  
938 and immunologic studies and wrote the manuscript. C.S., M.E.J., A.T., R.M.T contributed  
939 equally, and S.F.G and A.D.W. are co-senior authors.

# FIGURE 1

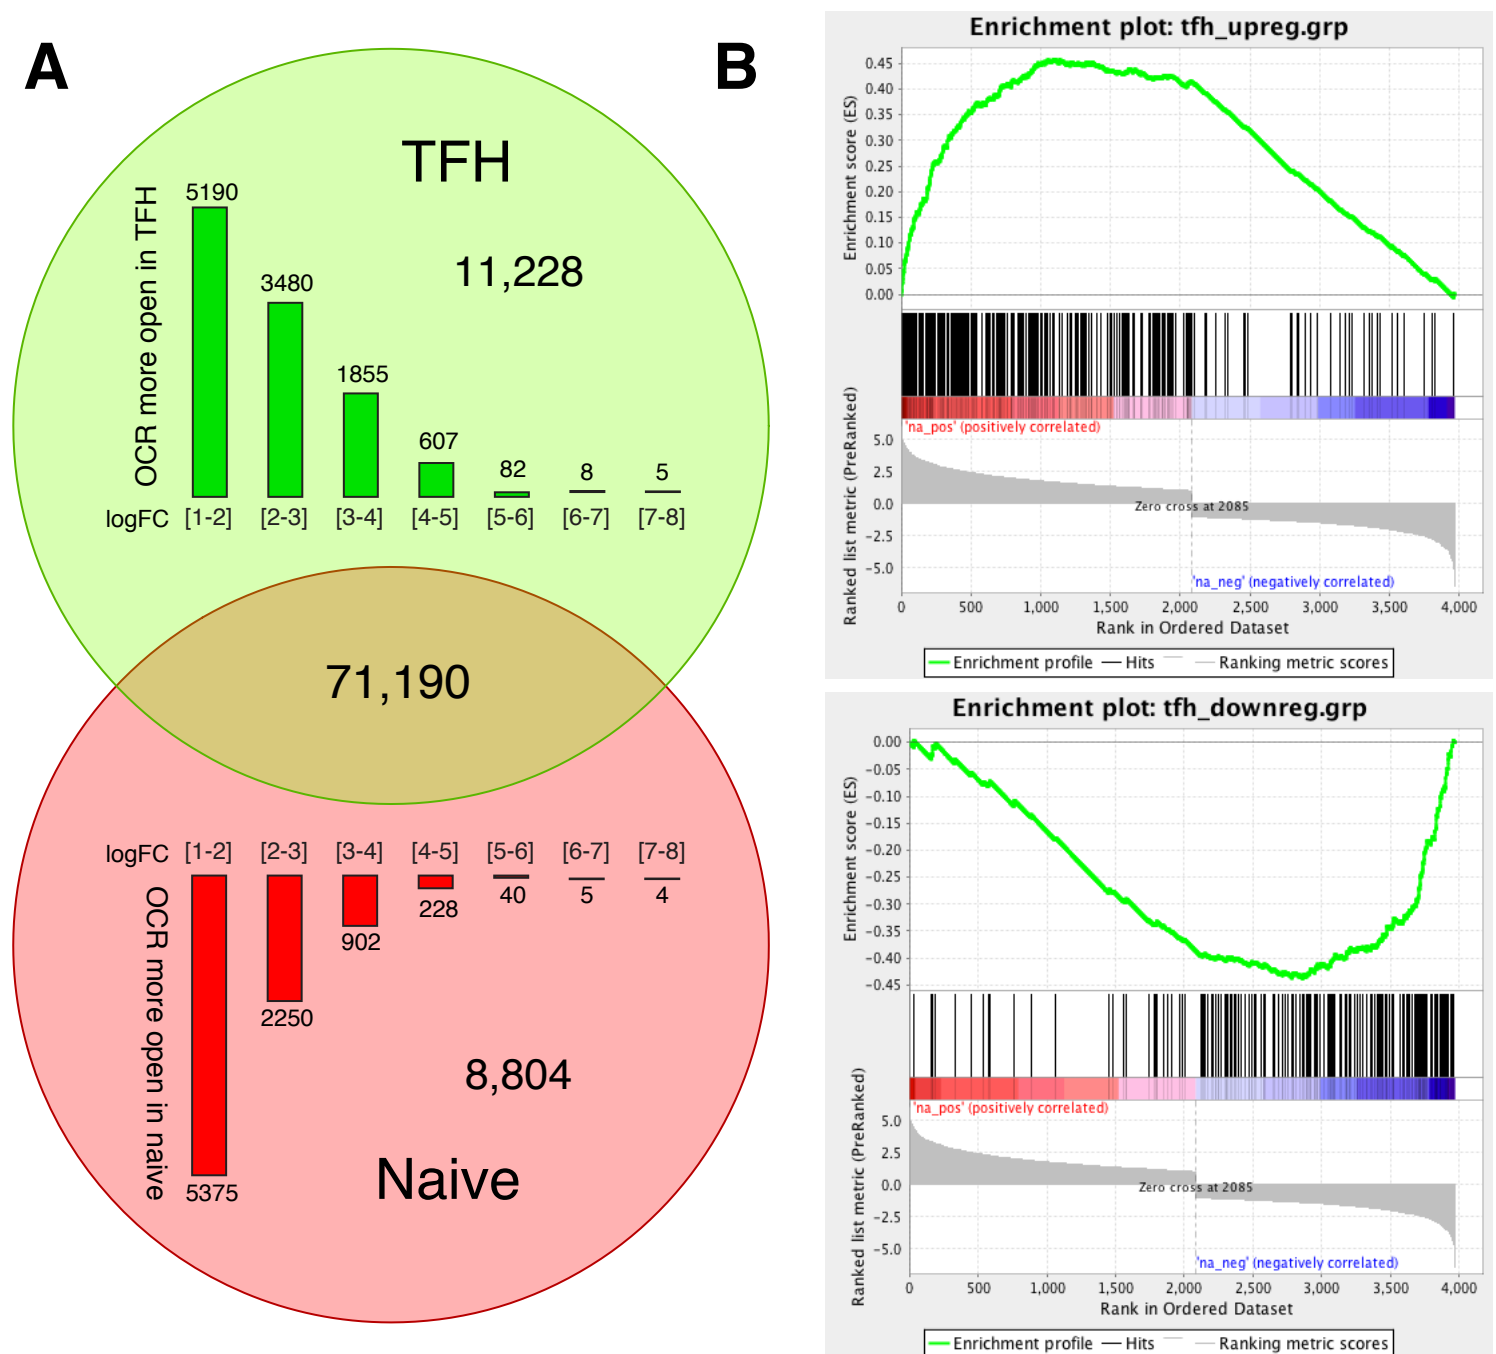

FIGURE 1. ATAC-seq analysis of open chromatin landscapes in naïve and follicular helper T cells from human tonsil. a. Quantitative differences between naïve and follicular helper T cell open chromatin landscapes. A total of 91,222 OCR were used as reference for differential analysis of genome accessibility. The number of statistically up- (green) or down- (red) regulated OCR in TFH compared to naïve is shown as a Venn diagram and also plotted as a function of log<sub>2</sub> fold change. b. GSEA enrichment analysis of genes with differential promoter accessibility at promoter regions. The log<sub>2</sub> fold change in expression between naïve and follicular helper T cells was used to generate the pre-ranked list for GSEA.

## FIGURE 2

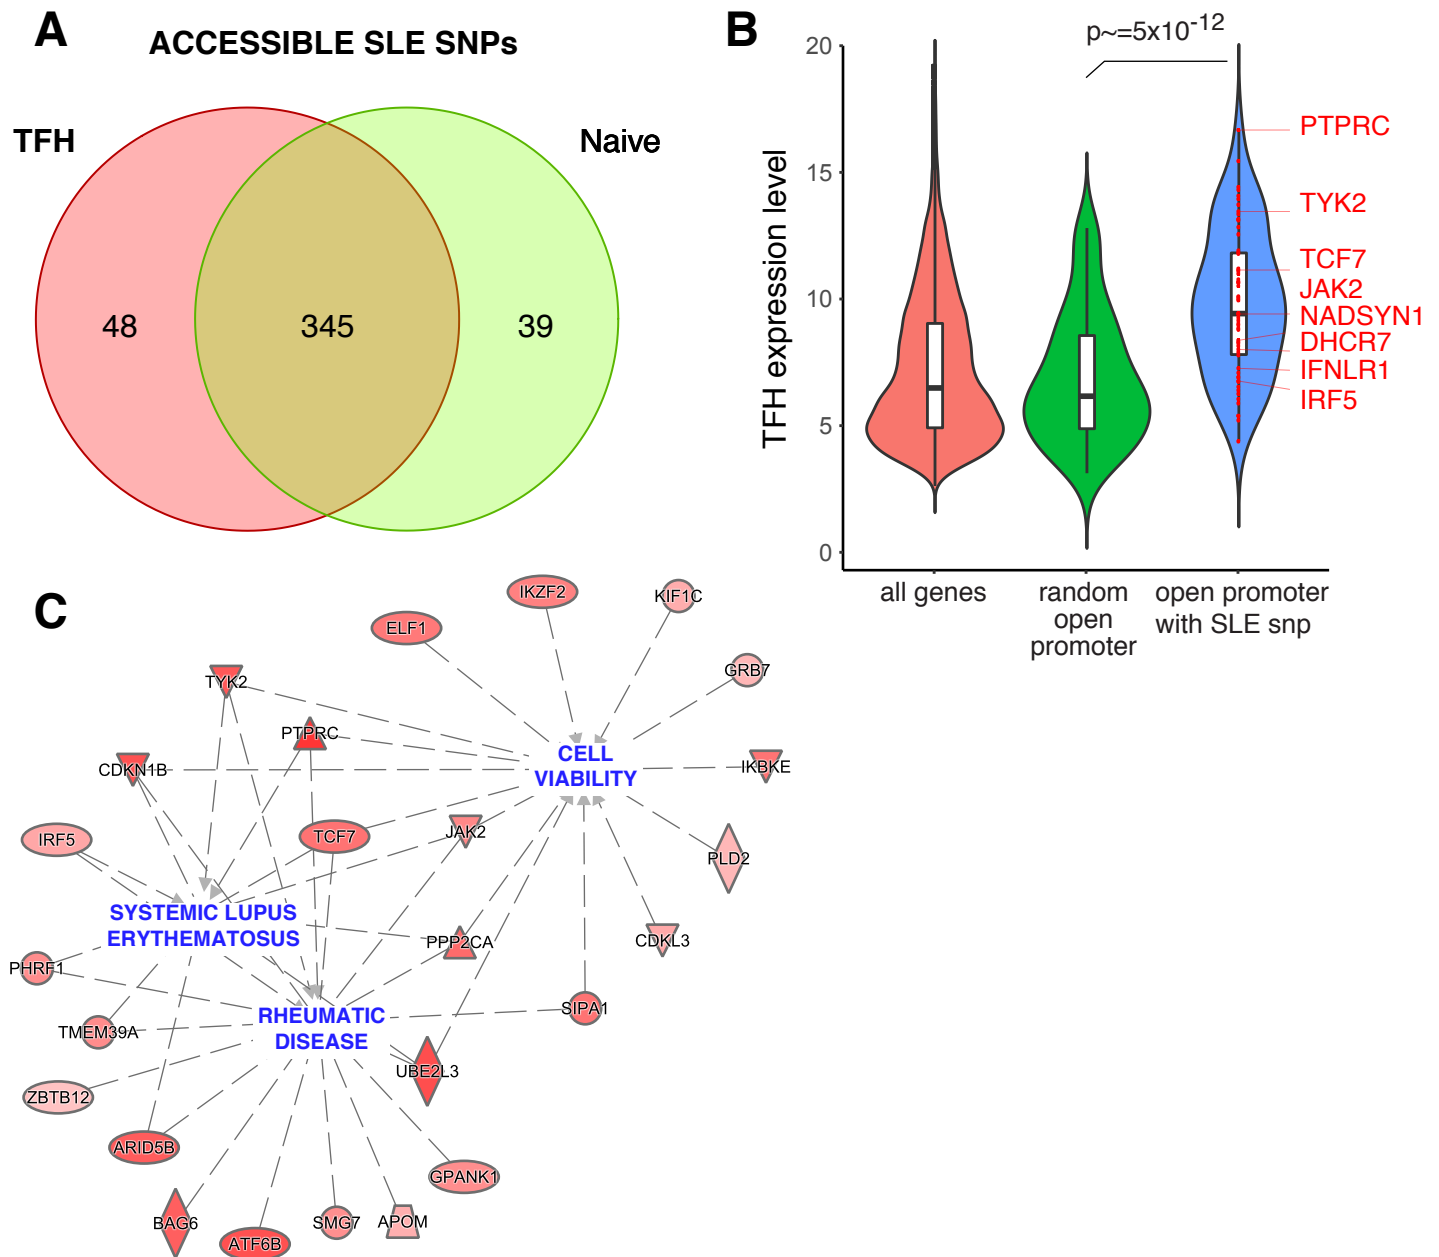

FIGURE 2. Genes harboring accessible SLE variants in naïve and follicular helper T cells. a. Comparison of accessible SLE SNPs between TFH and naïve tonsillar T cells. b. Comparison of the expression levels of genes with accessible SLE SNPs in their promoters in TFH vs. all genes or a random sample of genes with no accessible SLE SNPs in their promoters. A Wilcoxon rank test was performed to evaluate the significance of differential expression between gene sets. c. Ingenuity disease network for the genes with accessible SLE variants at promoters. The color gradient represents the log<sub>2</sub> fold change IN expression in TFH compared to naïve T cells.

## FIGURE 3

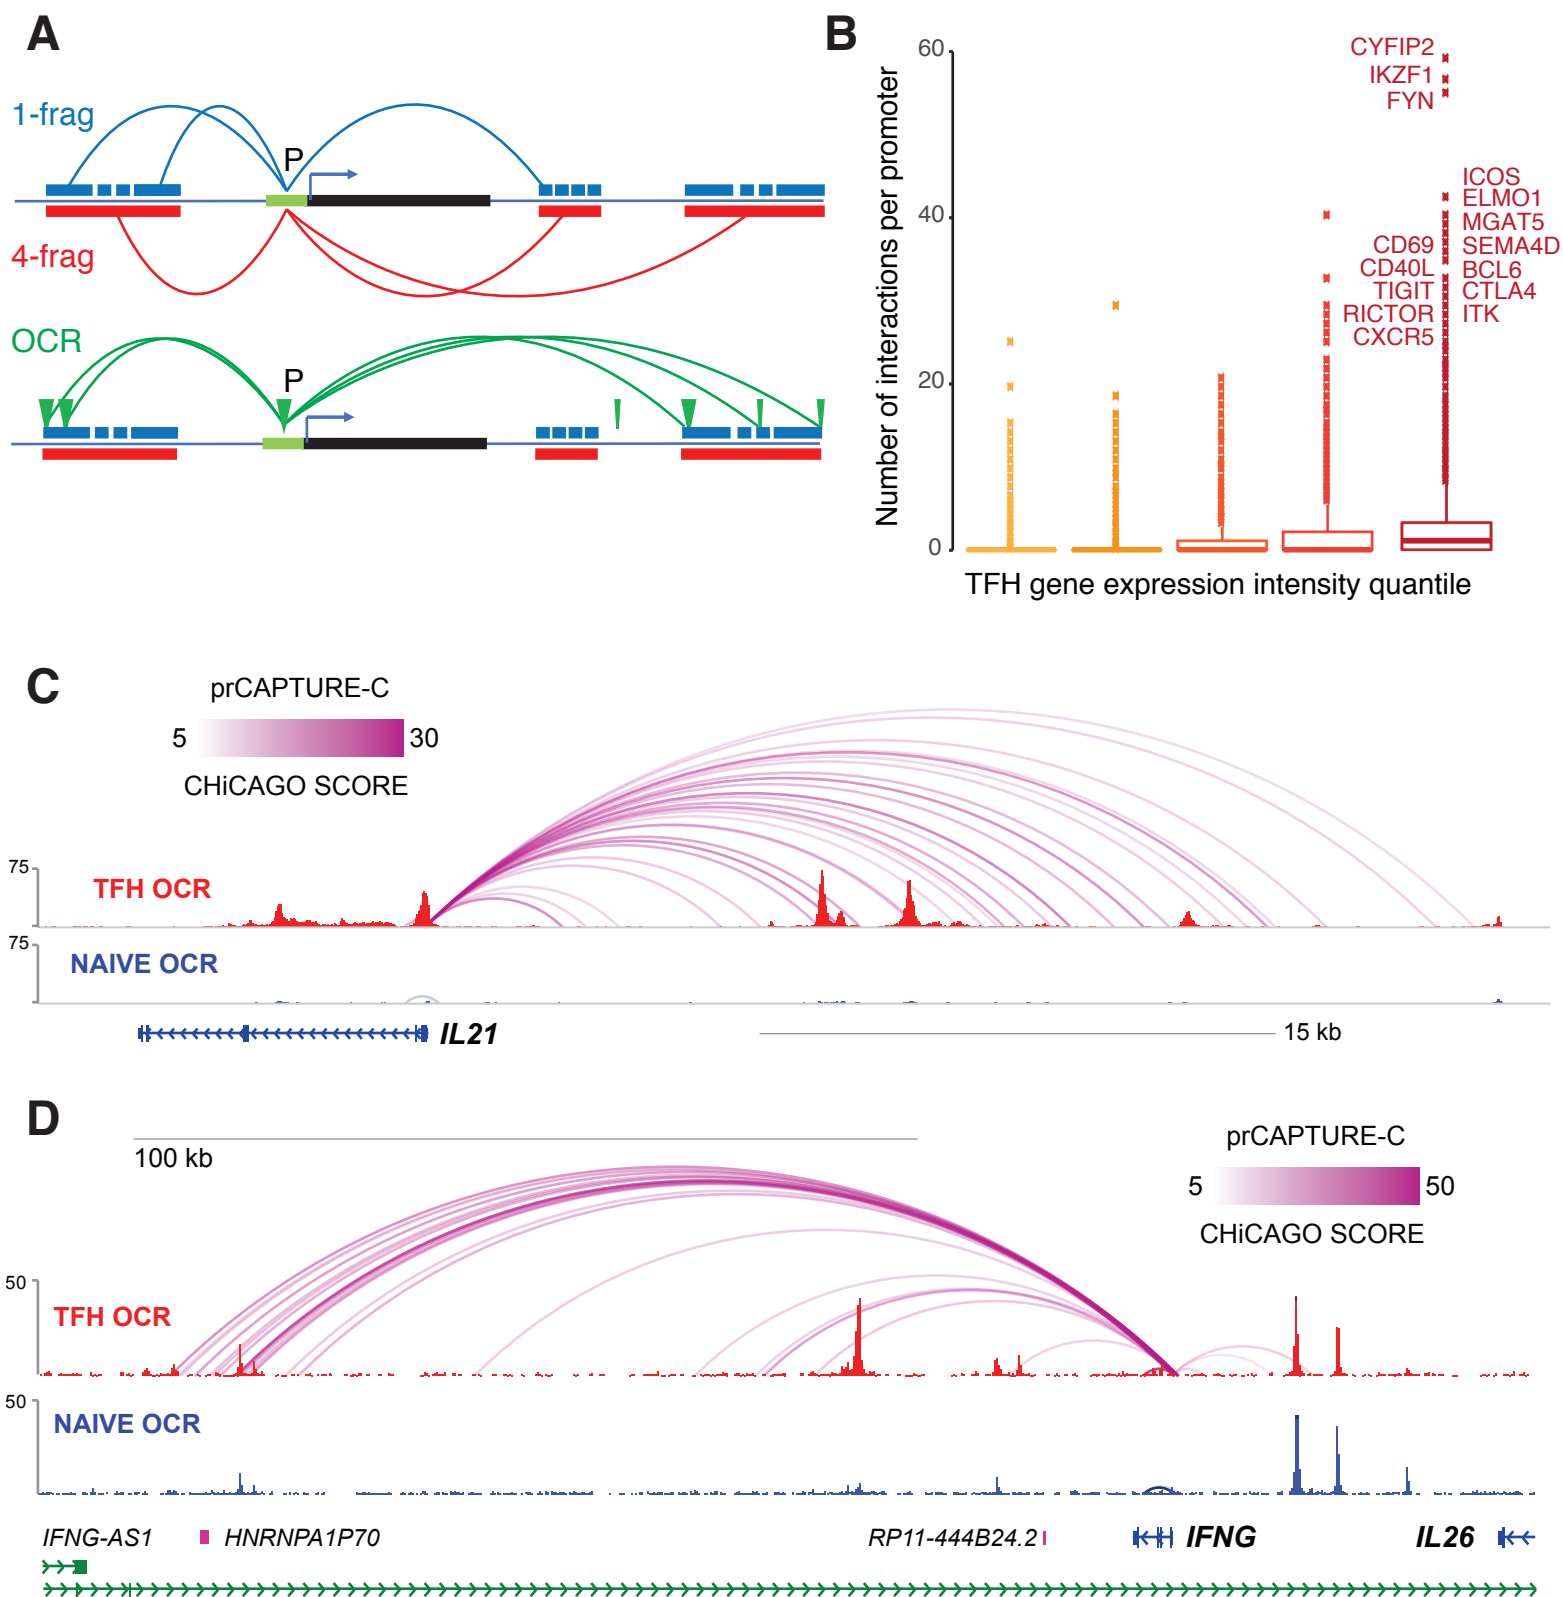

FIGURE 3. High-resolution, fragment-based Capture-C analysis of promoter connectomes in naïve and follicular helper T cells. a. Cartoon depicting the approaches for 1 DpnII fragment promoter interaction analysis, 4 DpnII fragment promoter interaction analysis, and promoter-OCR interaction analysis. b. The relationship between the number of interactions per gene promoter and expression of the corresponding gene is shown. Gene expression was binned into the lowest 20th, 20-40th, 40-60th, 60-80th and >80th percentiles. Lower and upper boxplot hinges correspond to the first and third quartiles, and outliers were defined as  $> 1.5 \times \text{IQR}$  from the hinge. WashU browser depictions of fragment-based promoter interactions and ATAC-seq accessibility at the *IL21* (c) and *IFNG* (d) loci in TFH (red) and naïve T cells (blue). Color gradients represent the CHI-CAGO scores.





FIGURE 4. Enrichment of chromatin signatures at promoter interacting regions. a. PIR enrichment for genomic features compared with distance-matched random regions in naive T cells. Error bars show SD across 100 draws of non-significant interactions. b. Feature enrichment at promoter-interacting OCR (iOCR) compared to a random sample of non-promoter-interacting OCR in naive T cells. c. Enrichment of iOCR within chromHMM-defined chromatin states and TSS neighborhood in naive T cells. ChromHMM 15-state models defined on the basis of 5 histone modifications (H3K4me1, H3K4me3, H3K27me3, H3K27ac and H3K36me3) are shown in the middle panel, with blue color intensity representing the probability of observing the mark in each state. The heatmap to the left of the emission parameters displays the overlap fold enrichment for iOCR in promoters (prOCR) and non-promoter iOCR (nonprOCR), while the heatmap to the right shows the fold enrichment for each state within 2 kb around a set of TSS. Blue color intensity represents fold enrichment.

## FIGURE 5

### Promoter-OCR interactions

**A**

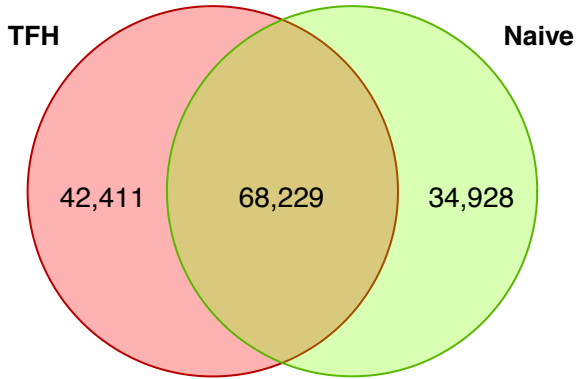

**B**

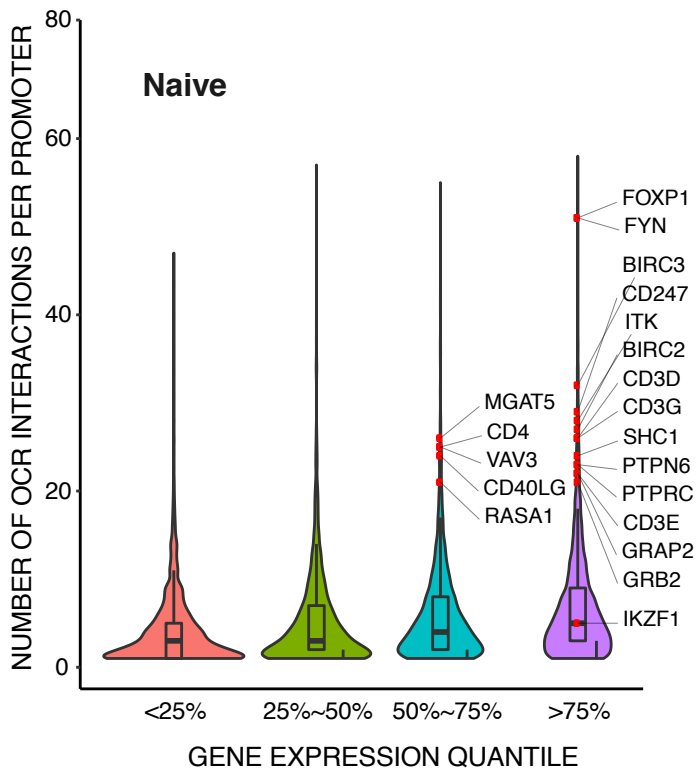

**C**

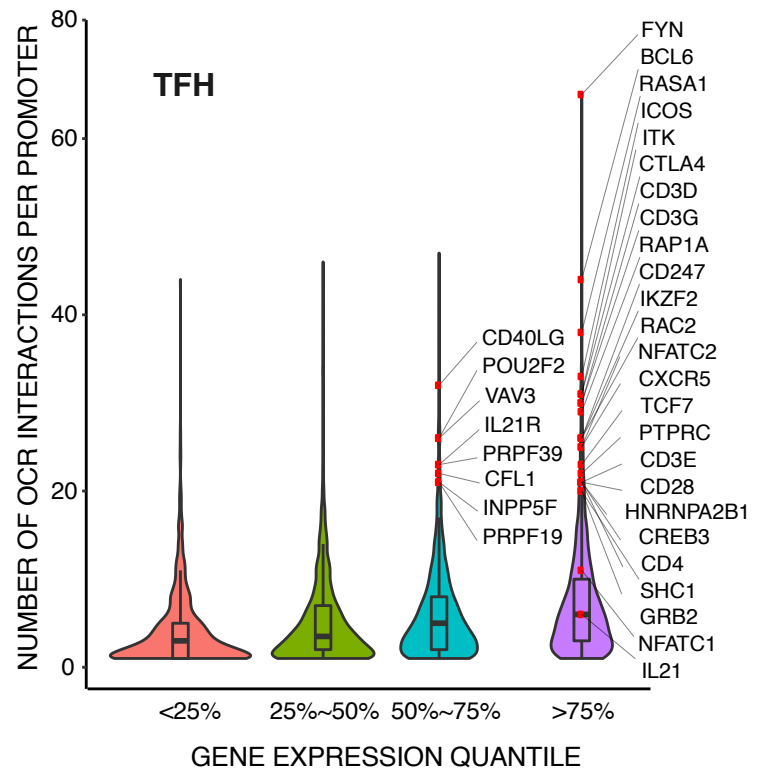

**D**

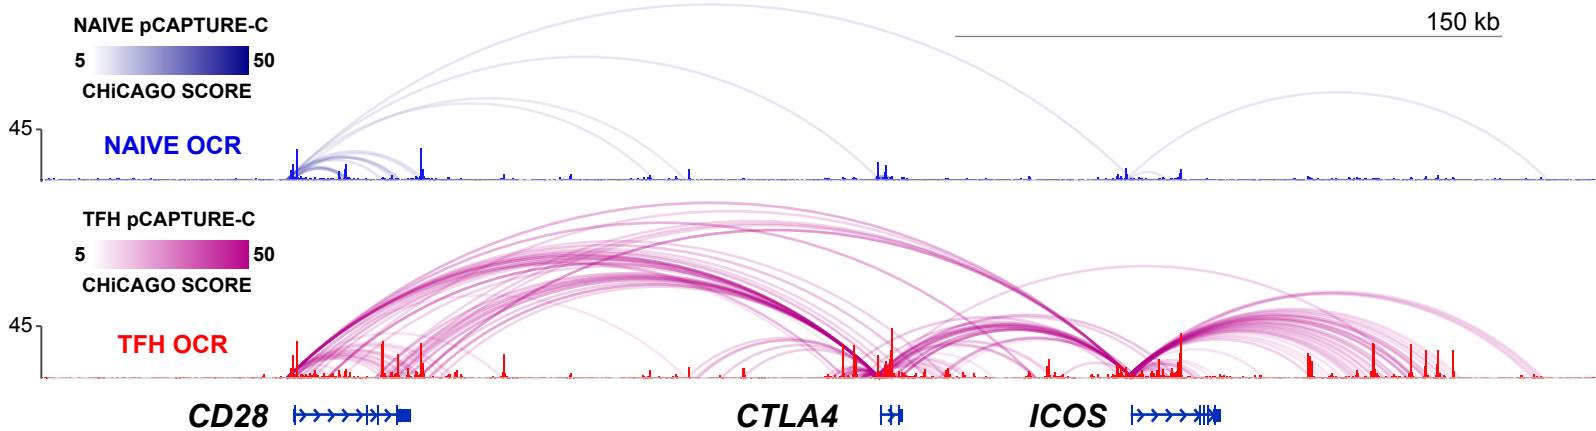

FIGURE 5. Analysis of promoter-open chromatin connectomes in naïve and follicular helper T cells. a. Comparison of promoter-OCR interactions between TFH and naïve T cells. Relationship between the number of promoter-OCR interactions at a gene and its corresponding expression level in naïve T cells (b) and TFH (c) are depicted with genes with recognized functions in naïve and TFH labeled. d. Promoter-OCR interactions and ATAC-seq accessibility at the CD28, CTLA4 and ICOS loci in TFH (red) and naïve T cells (blue).

## FIGURE 6

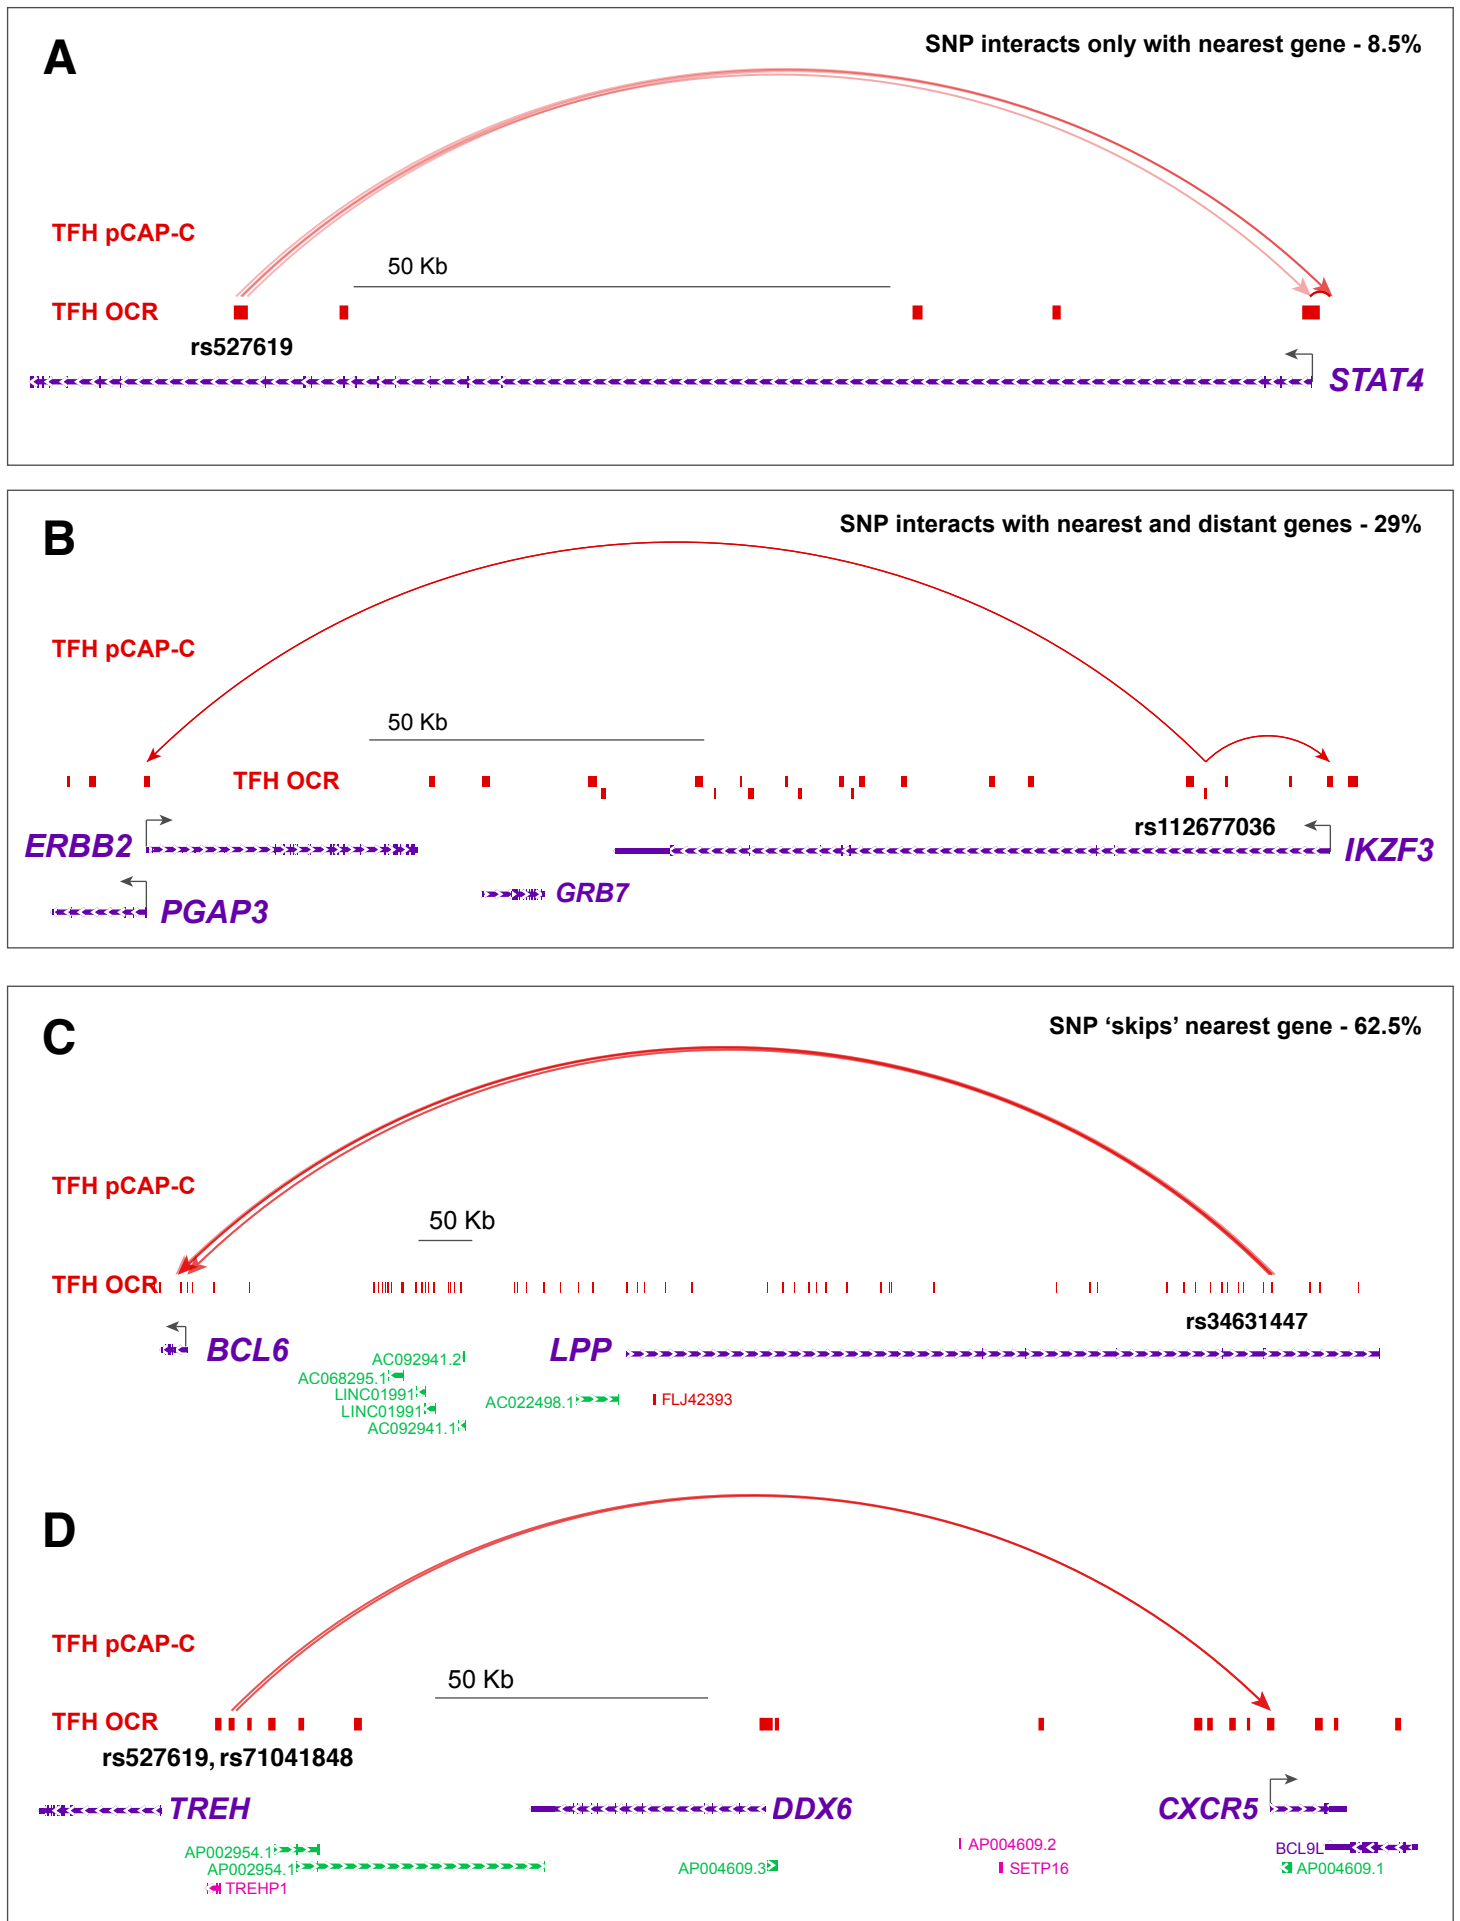

FIGURE 6. SLE variant-to-gene mapping through integration of GWAS and promoter-open chromatin connectomes in follicular helper T cells. Four categories of accessible SLE SNP-promoter interactions were detected. a. Accessible SLE SNP uniquely interacts with the nearest promoter (8.5%). An example is rs527619, which physically interacts only with the nearest gene STAT4. b. Accessible SLE SNP interacts with the nearest promoter and at least one distant promoter (29%). An example is rs112677036, which physically interacts with IKZF3 and the distant ERBB2 and PGAP3 genes. c. Accessible SLE SNP 'skips' the nearest promoter to interact exclusively with on or more distant promoters (62.5%). Examples are (c) rs34631447, which skips LPP to physically interact with BCL6, and (d) rs527619 and rs71041848, which interact with the distant CXCR5 gene instead of the nearest gene, TREH.

## FIGURE 7

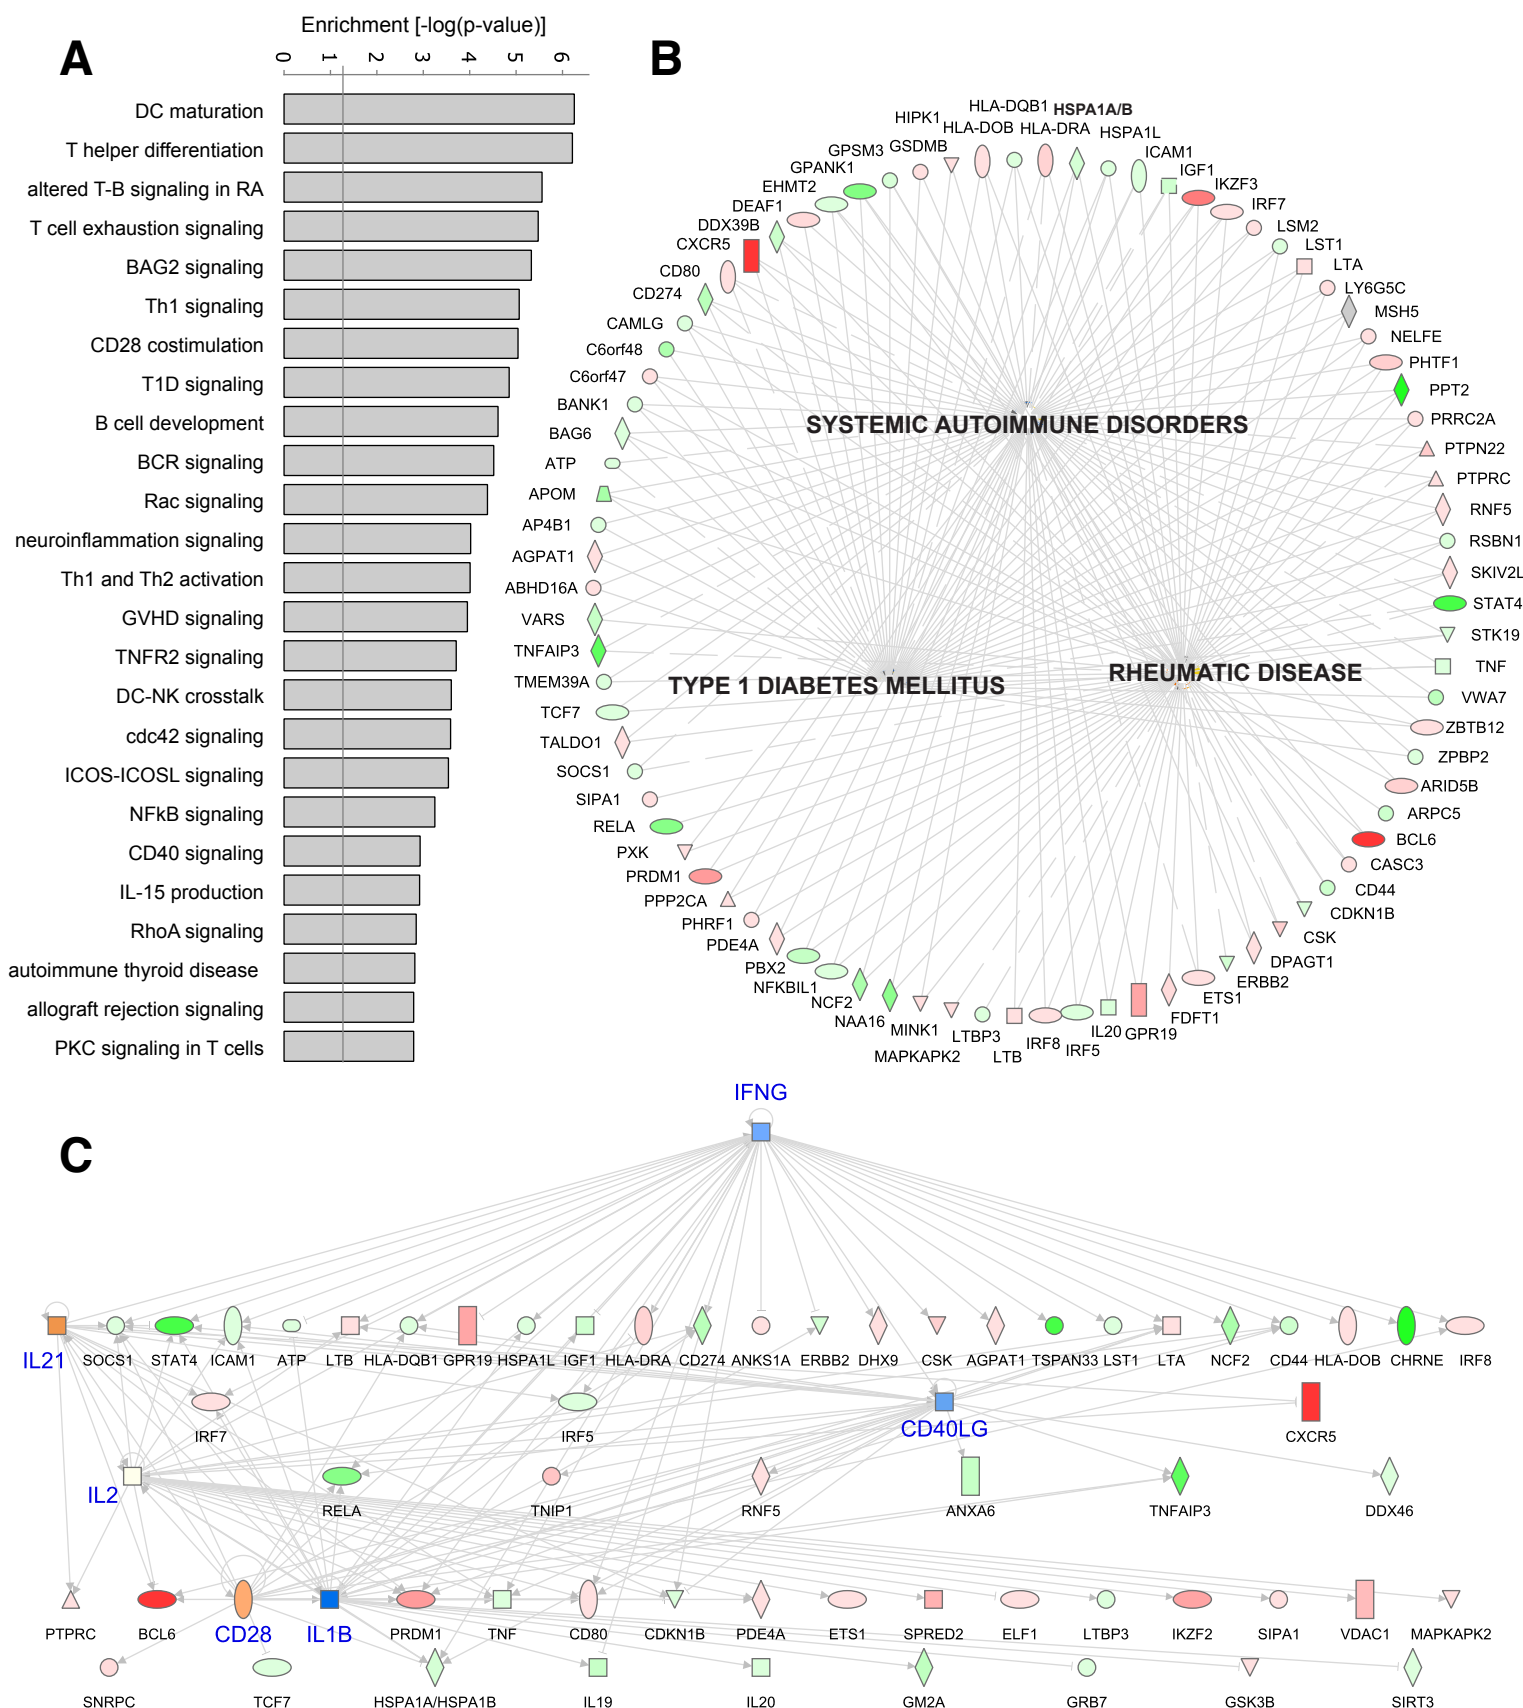

FIGURE 7. Ontology and pathway analysis of genes implicated through integration of GWAS and promoter-open chromatin connectomes in follicular helper T cells from human tonsil. a. Enrichment of the top 25 canonical pathways (a) and 3 disease networks (b) among genes implicated through promoter-open chromatin connectomes in TFH. c. Regulatory hierarchical network from SLE-connectome-implicated genes. Color gradients in b and c represent log<sub>2</sub> expression changes between TFH and naïve T cells, with green indicating down-regulation and red indicating up-regulation in TFH. Blue nodes in c represent regulatory hubs for genes with no SLE-OCR connectome detected.

## FIGURE 8

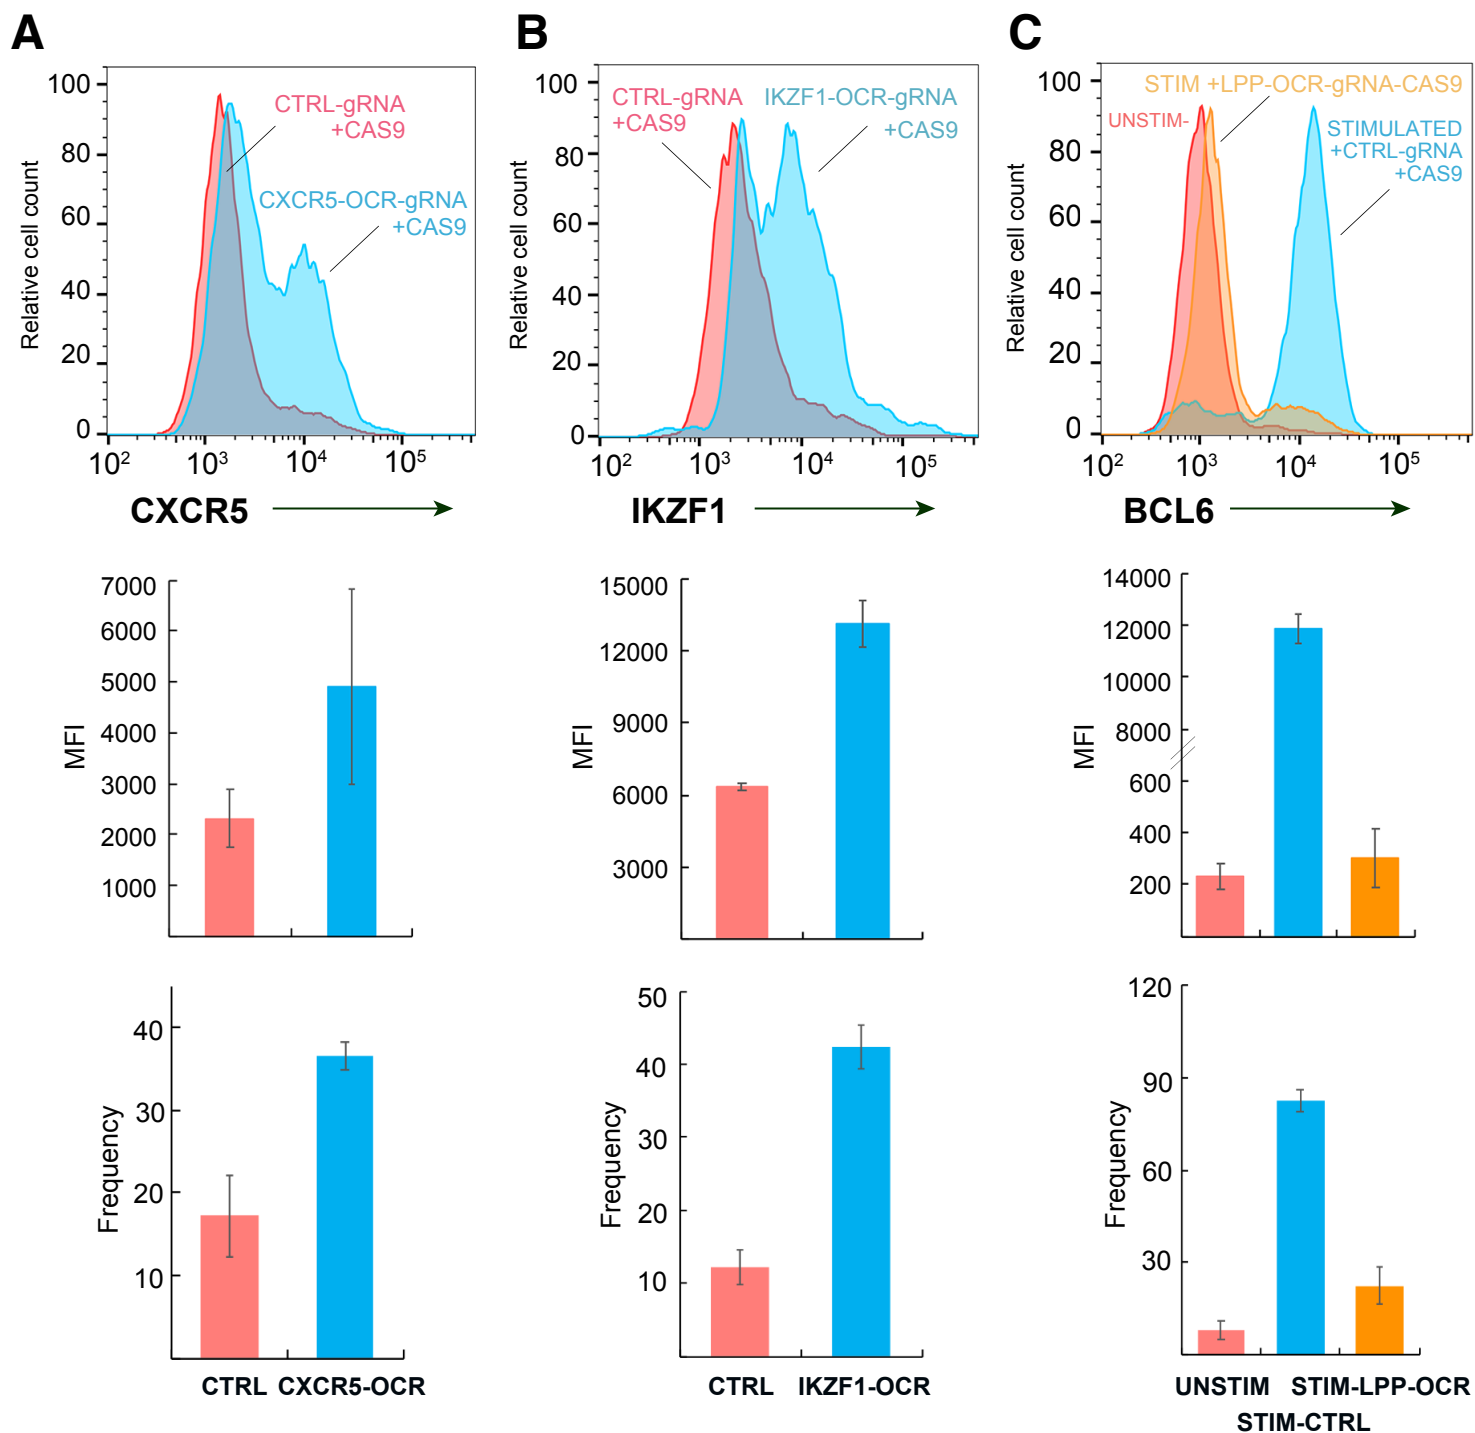

**FIGURE 8. CRISPR/CAS9-based deletion of accessible, promoter-connected genomic regions harboring SLE variants influences TFH gene expression.** a, CRISPR-CAS9 targeting of the 136 bp OCR near the TREH gene harboring the rs527619 and rs71041848 SLE proxy SNPs and captured interacting with the CXCR5 promoter leads to increased CXCR5 expression (blue histogram) by Jurkat cells compared to cells transduced with a CTRL-gRNA+CAS9 (pink histogram). b, CRISPR-CAS9 targeting of the 213 bp OCR containing the rs4385425 SLE proxy and captured interacting with the IKZF1 promoter leads to increased IKZF1 (Ikaros) expression (blue histogram) by Jurkat cells compared to cells transduced with a CTRL-gRNA+CAS9 (pink histogram). c, CRISPR-CAS9 targeting of the LPP SLE proxy SNPs rs34631447 and rs79044630 captured interacting with the BCL6 promoter abrogates IFN $\gamma$ -induced BCL-6 expression (orange histogram) compared to cells transduced with a CTRL-gRNA+CAS9 (blue histogram). The red histogram shows BCL-6 expression by unstimulated Jurkat cells. Bar graphs in a-c depict the mean fluorescence intensity (upper panels) and percent positive cells (lower panels) for CXCR5, Ikaros, and BCL-6 in control gRNA-transduced vs. targeted cells. All data are representative of three independent experiments. See Supplemental Figure 7 for design and validation of CRISPR/CAS9-mediated deletion and mutation.

## FIGURE 9

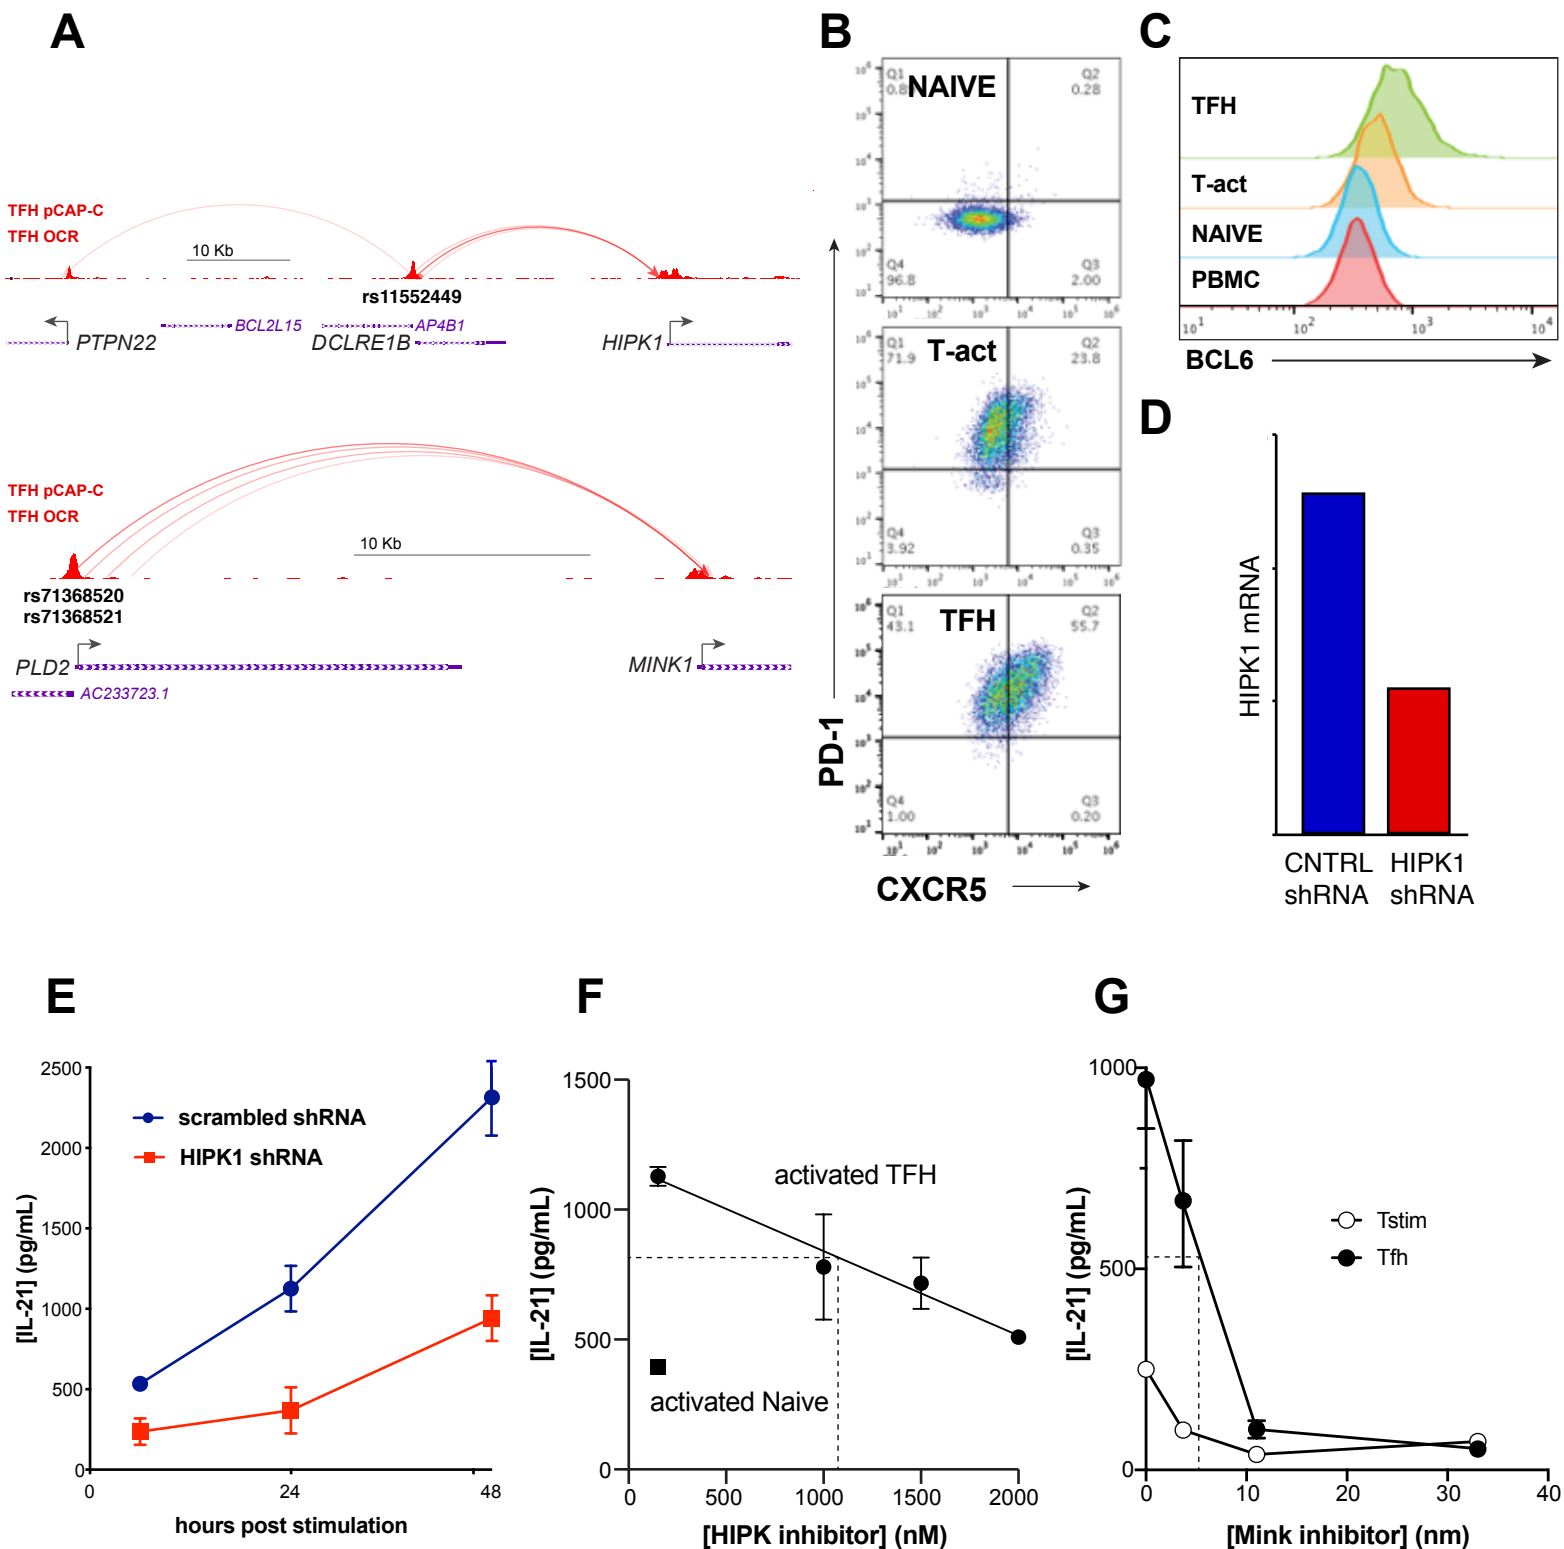

FIGURE 9. SLE variant-to-gene mapping implicates novel drug targets for modulation of TFH function. a. The interactomes of SLE proxy SNPs rs11552449, rs71368520, and rs71368521 implicate HIPK1 and MINK1. b. Purified naïve CD4+ T cells cultured under TFH-skewing conditions show increased expression of PD-1 and CXCR5, as well as BCL-6 (c). d. HIPK1 mRNA expression by in vitro-differentiated TFH cells transduced with scrambled Lenti-shRNA or Lenti-HIPK-1 shRNA. e. shRNA-mediated knock-down of HIPK1 inhibits IL-21 secretion by TFH cells. f. A HIPK inhibitory drug causes dose-dependent inhibition of IL-21 production by TFH cells. g. A MINK inhibitory drug causes dose-dependent inhibition of IL-21 production by TFH cells. All data are representative of 3-4 independent experiments.



## SUPPLEMENTAL FIGURE 1

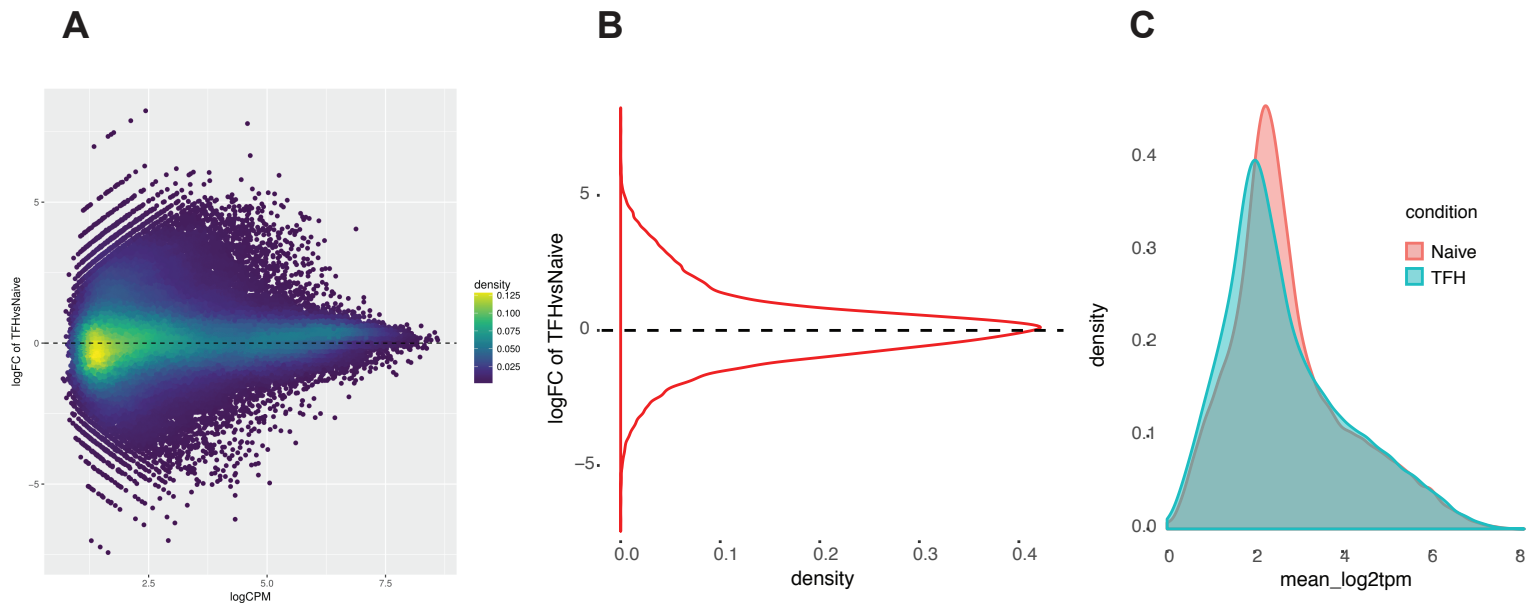

SUPPLEMENTARY FIGURE 1. TFH and naive T cells show comparable genomic accessibility. Overall log2 fold changes in reference OCR accessibility (CPM) in TFH compared to naive T cells represented by density plot (a) or distribution plot (b). c. The accessibility signal was normalized by the counts per million method and mean p values across three replicates were used for comparison between TFH and naive T cells.

## SUPPLEMENTAL FIGURE 2

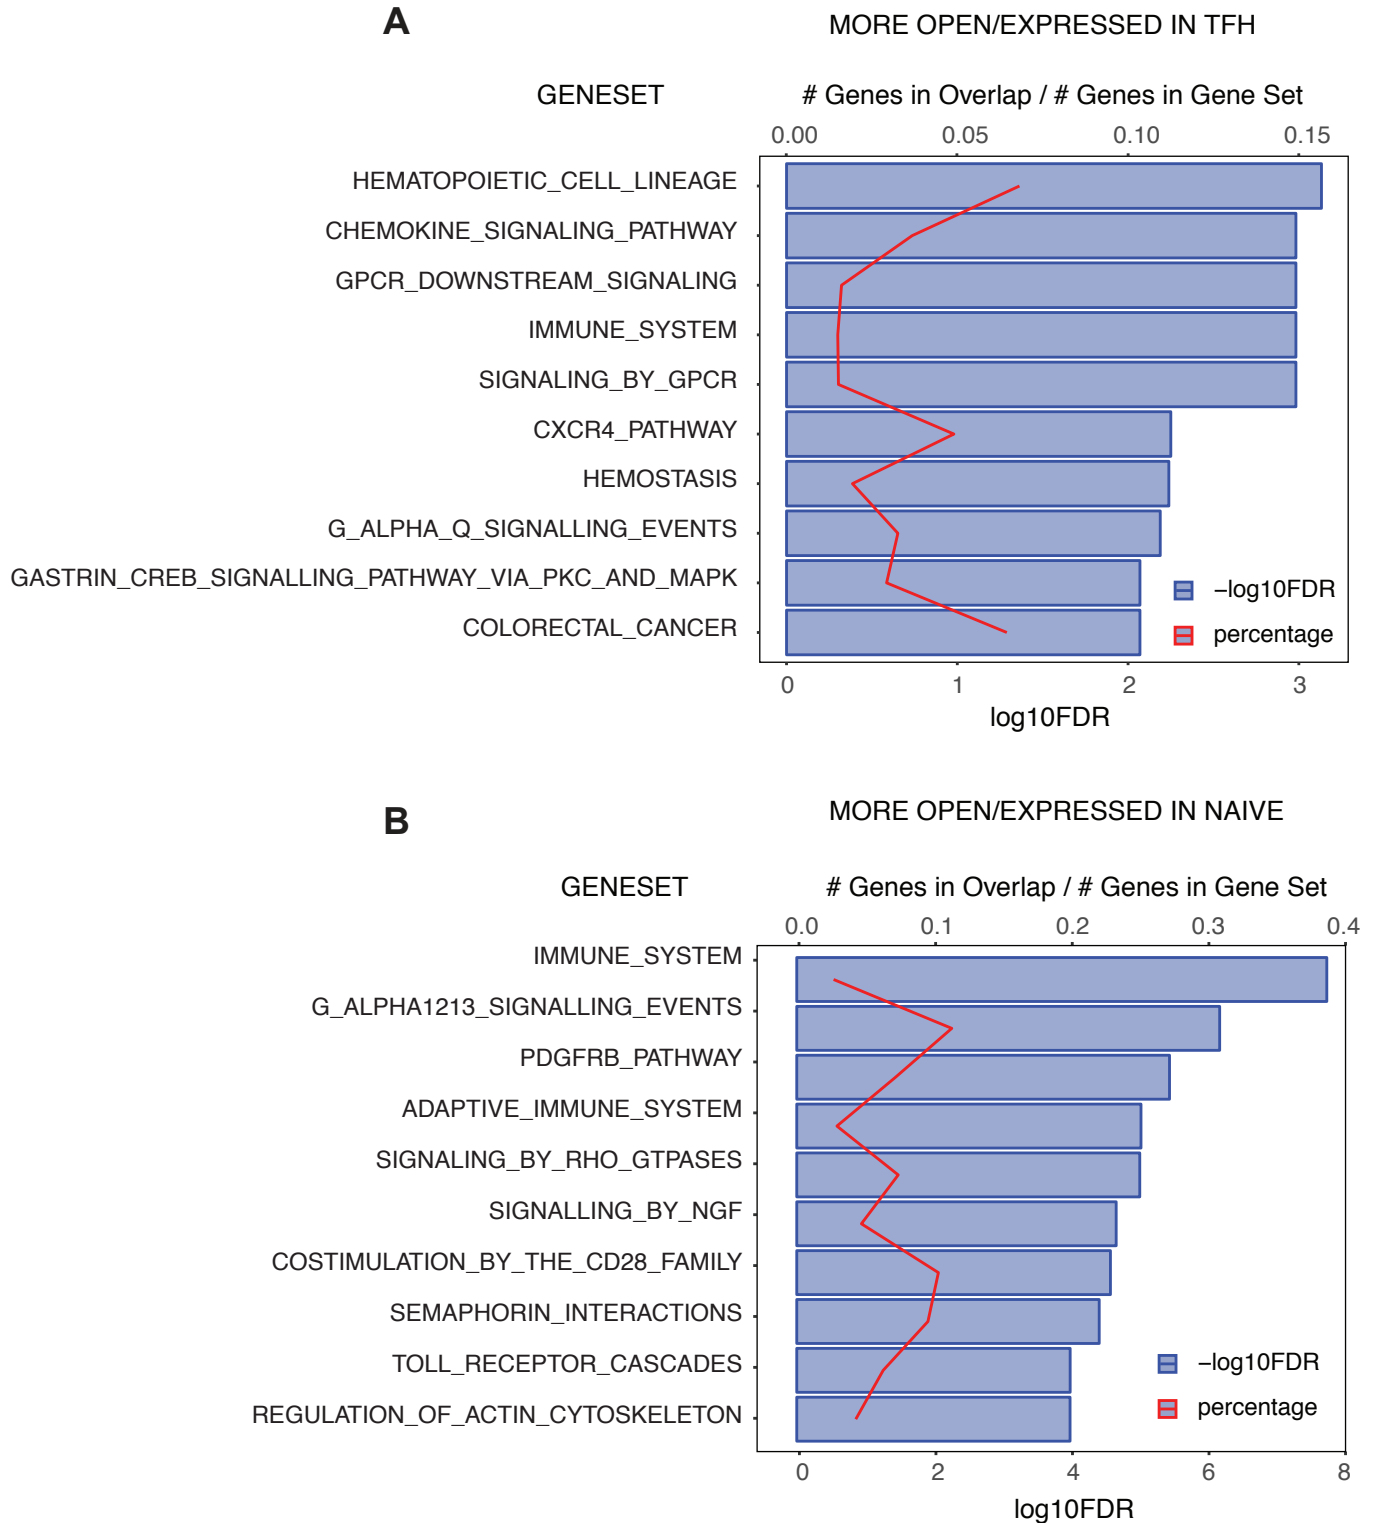

SUPPLEMENTARY FIGURE 2. Canonical pathway enrichment for genes with accessible SLE SNPs in their promoters. The  $\log_2\text{FDR}$  (blue) and gene ratios (red) for the top 10 enriched Ingenuity canonical pathways is shown for TFH (a) and naive (b) cells.

## SUPPLEMENTAL FIGURE 3

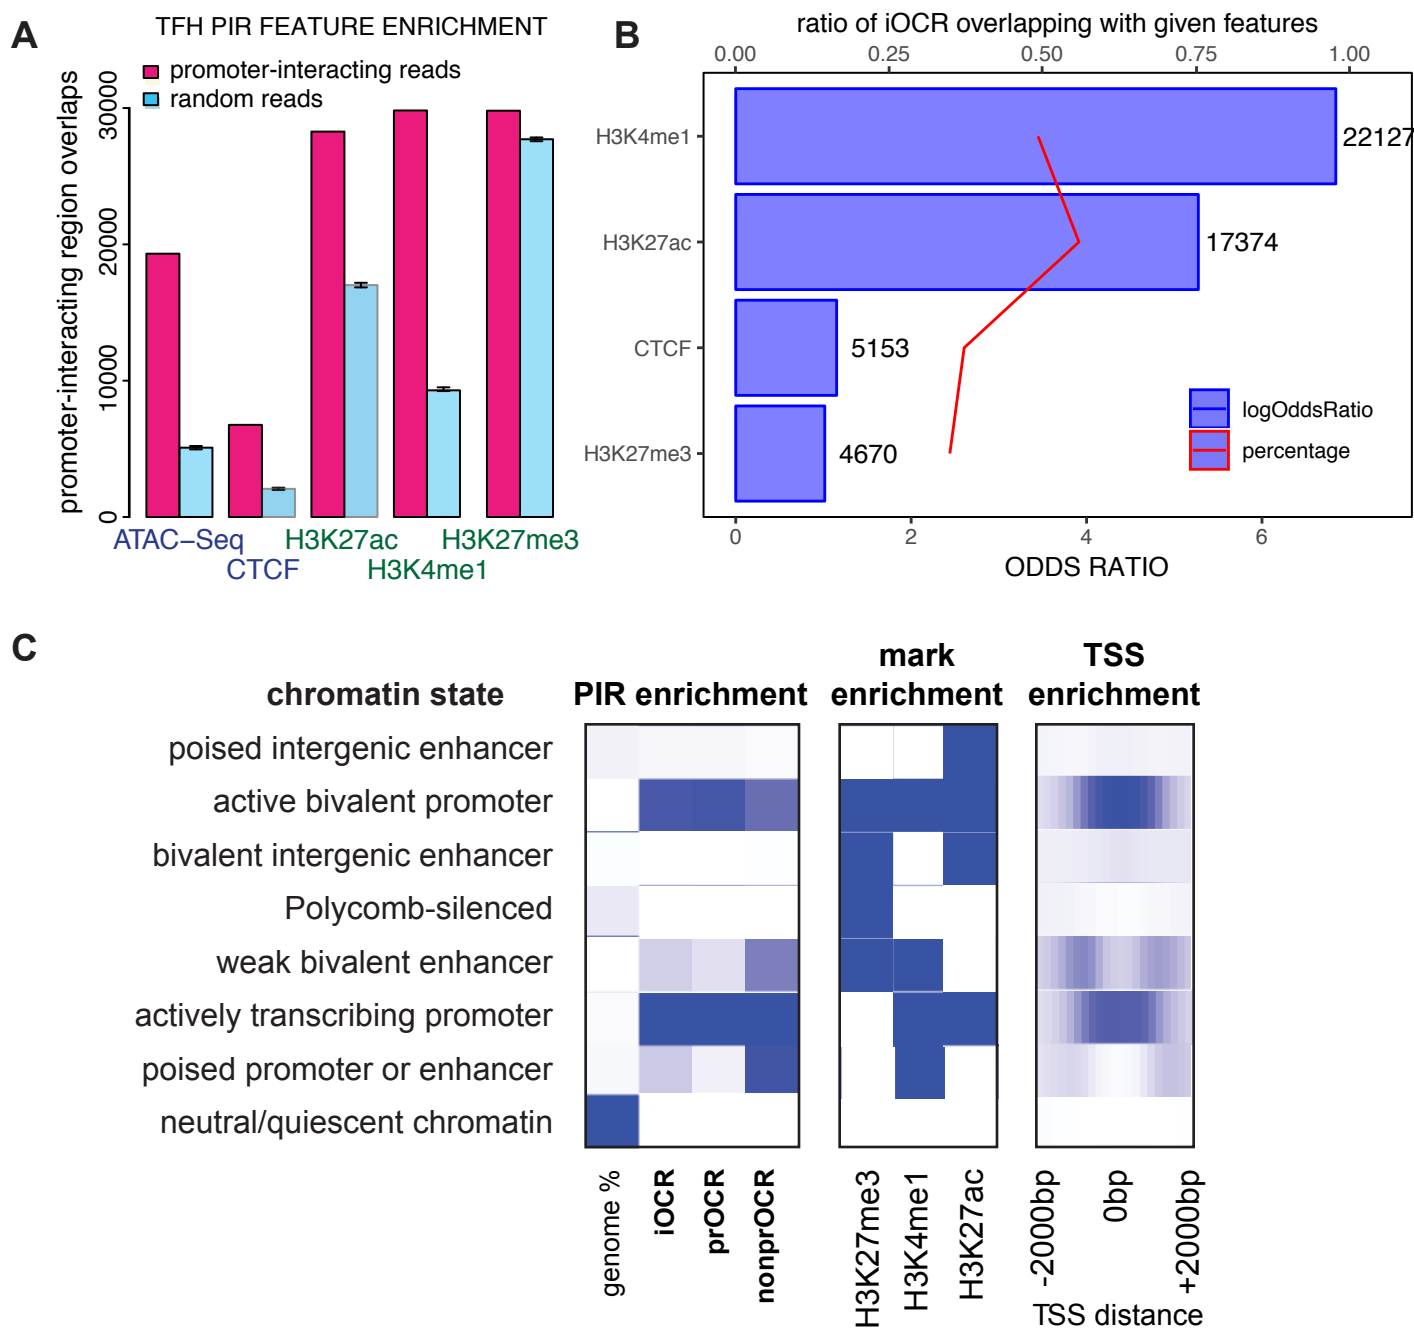

SUPPLEMENTARY FIGURE 3. Enrichment of chromatin signatures at promoter interacting regions in TFH cells. a. PIR enrichment for genomic features compared with distance-matched random regions in TFH cells. Error bars show SD across 100 draws of non-significant interactions. b. Feature enrichment of promoter-interacting OCR (iOCR) compared to a random sample of non-promoter-interacting OCR in TFH. c. Enrichment of iOCR within chromHMM-defined chromatin states and TSS neighborhood in TFH. Roadmap Epigenomics 15-state models (middle panel) were defined on the basis of 5 histone modifications (H3K4me1, H3K4me3, H3K27me3, H3K27ac and H3K36me3). Blue color intensity represents the probability of observing the mark in the state. The heatmap to the left of the emission parameters displays the overlap fold enrichment for different categories of iOCR, while the heatmap to the right shows the fold enrichment for each state within 2 kb around a set of TSS. Blue color intensity represents fold enrichment.

## SUPPLEMENTAL FIGURE 4

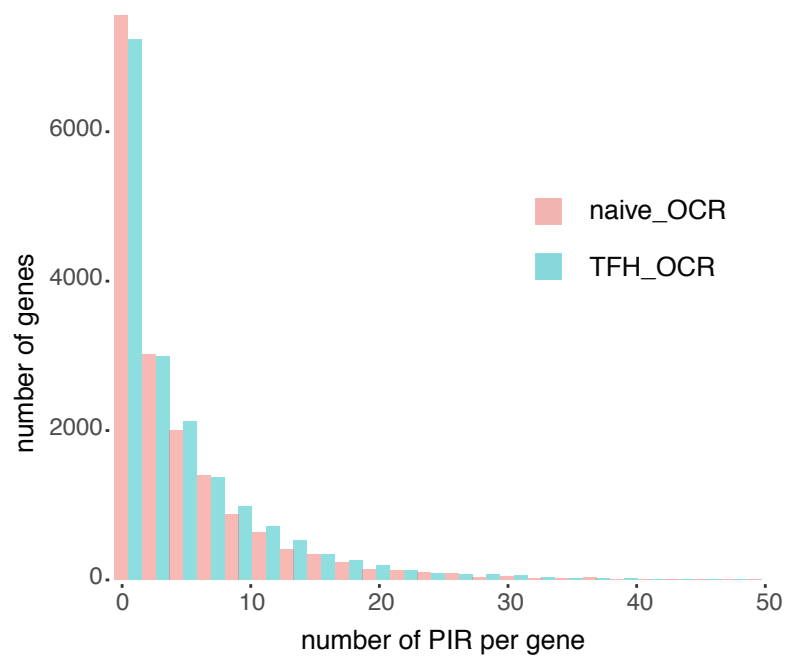

SUPPLEMENTARY FIGURE 4. Distribution of promoter-interacting OCR per gene in naïve T and TFH cells. The number of promoter-interacting OCR per gene is plotted for both naïve T (red) and TFH (blue) cells.

## SUPPLEMENTAL FIGURE 5

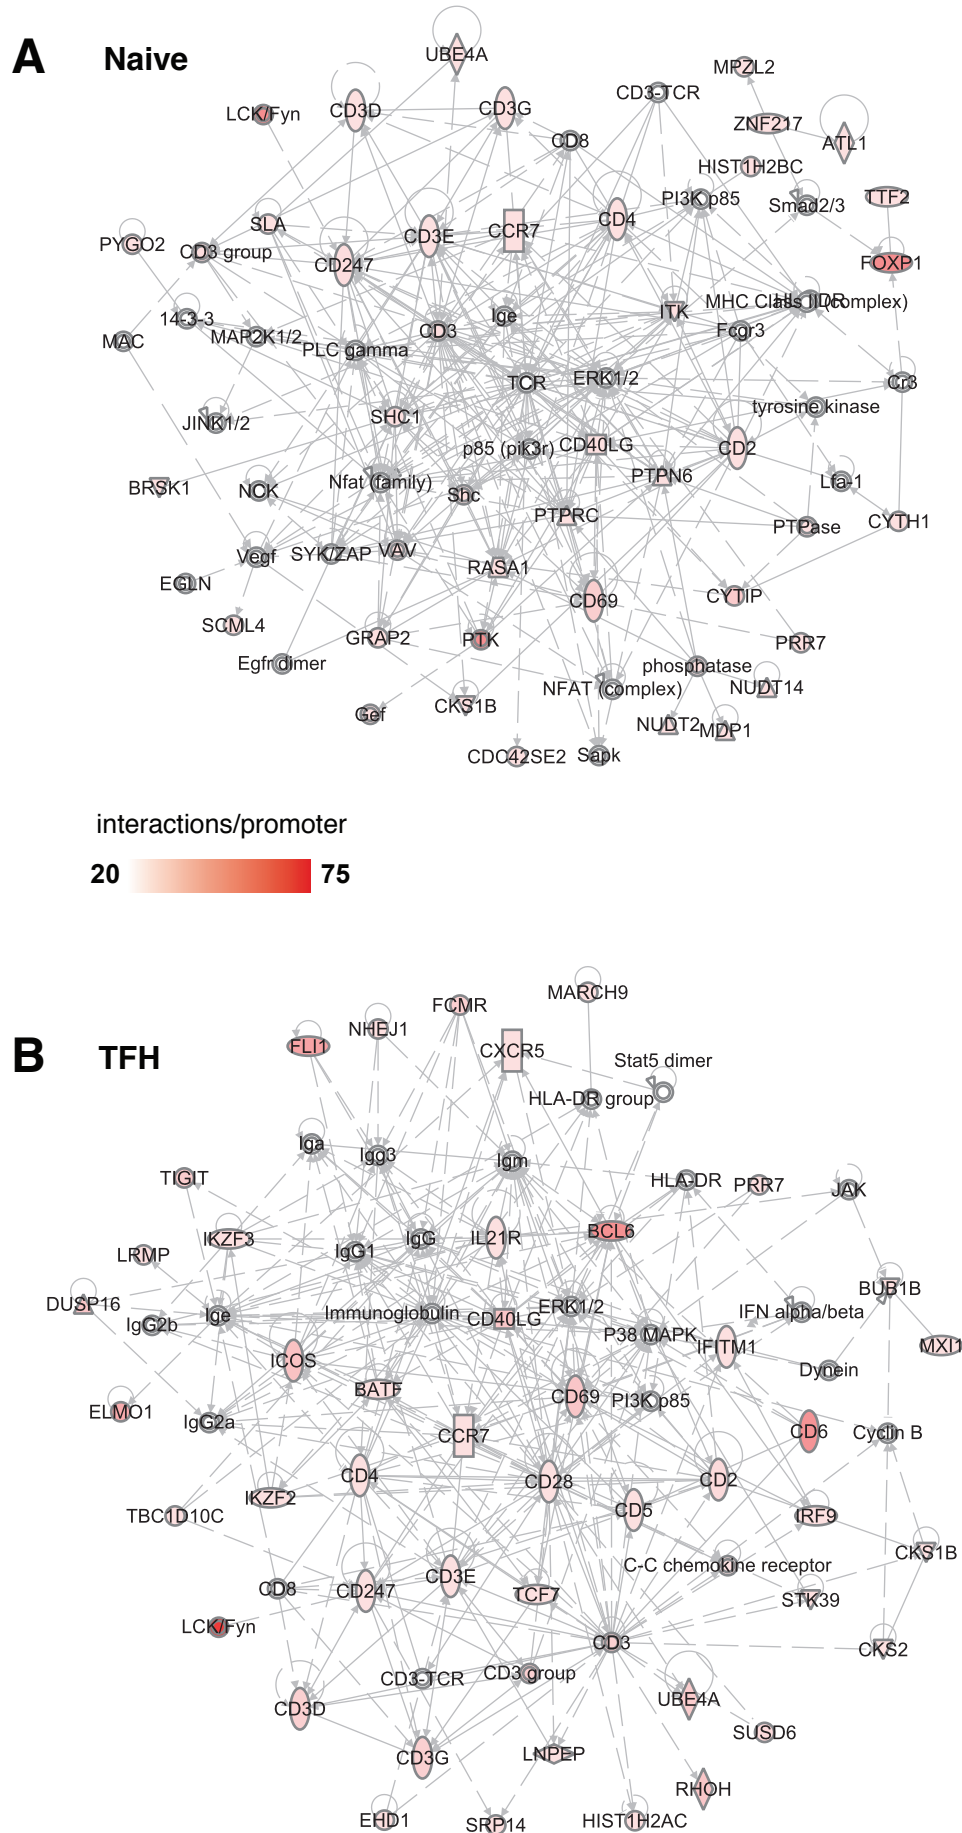

SUPPLEMENTARY FIGURE 5. Immune networks enriched among SLE SNP connectome implicated gene sets. The top 3 merged immune networks in naïve (a) and TFH (b) are depicted. Red color intensity represents the number of interactions detected per promoter for each gene in the network.

## SUPPLEMENTAL FIGURE 6

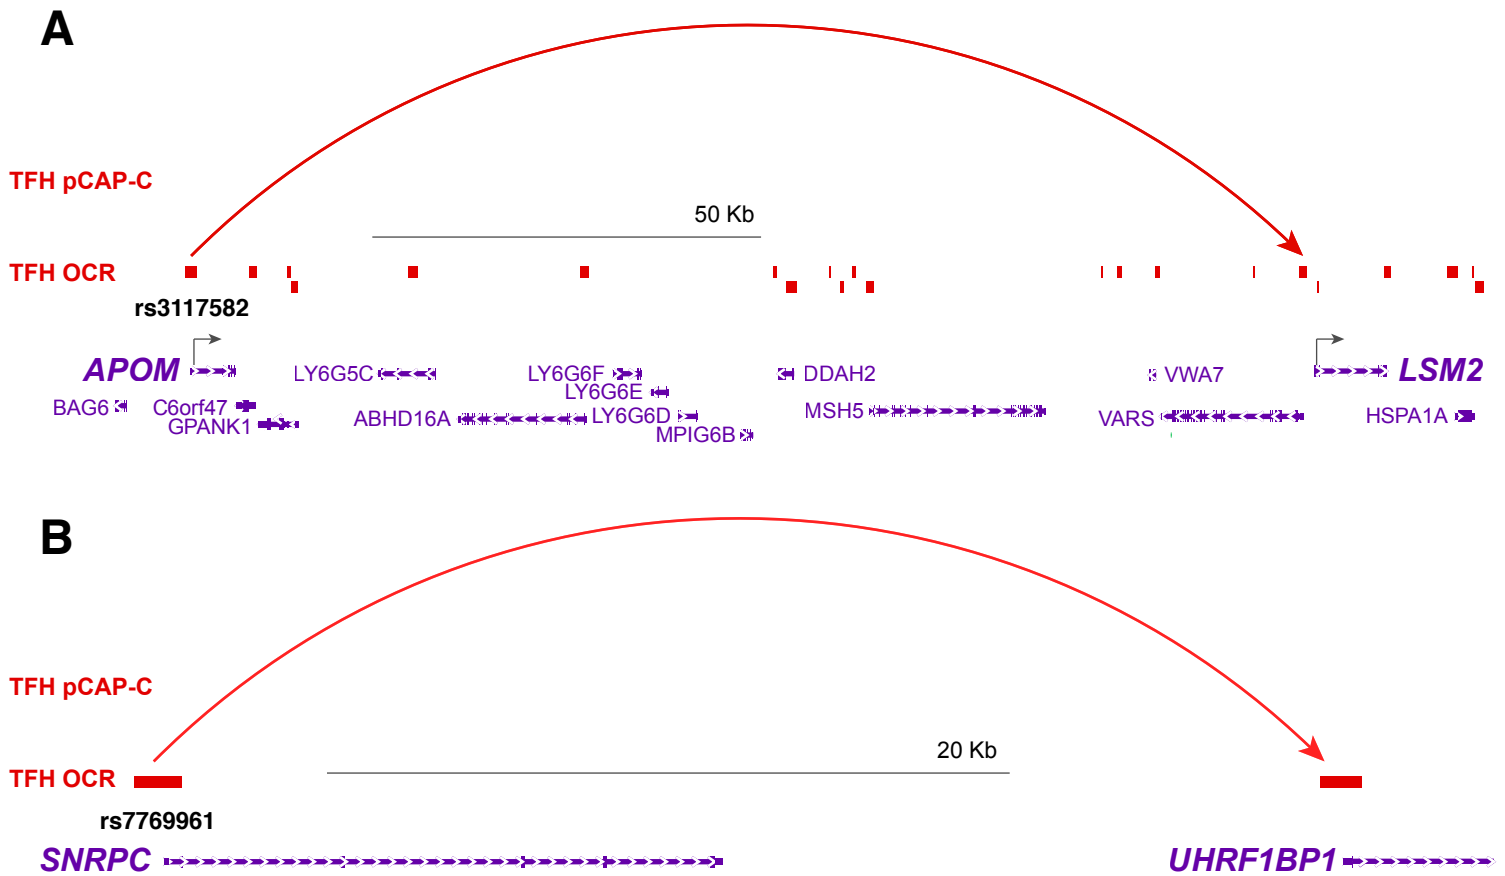

SUPPLEMENTARY FIGURE 6. Interaction of open SLE variants with genes encoding nuclear proteins targeted by autoantibodies in SLE patients. a. The accessible SNP rs3117582 at the promoter of APOM physically interacts with the LSM2 promoter. b. The accessible SNP rs7769961 at the SNRPC promoter physically interacts with the UHRF1BP1 promoter.

## SUPPLEMENTAL FIGURE 7

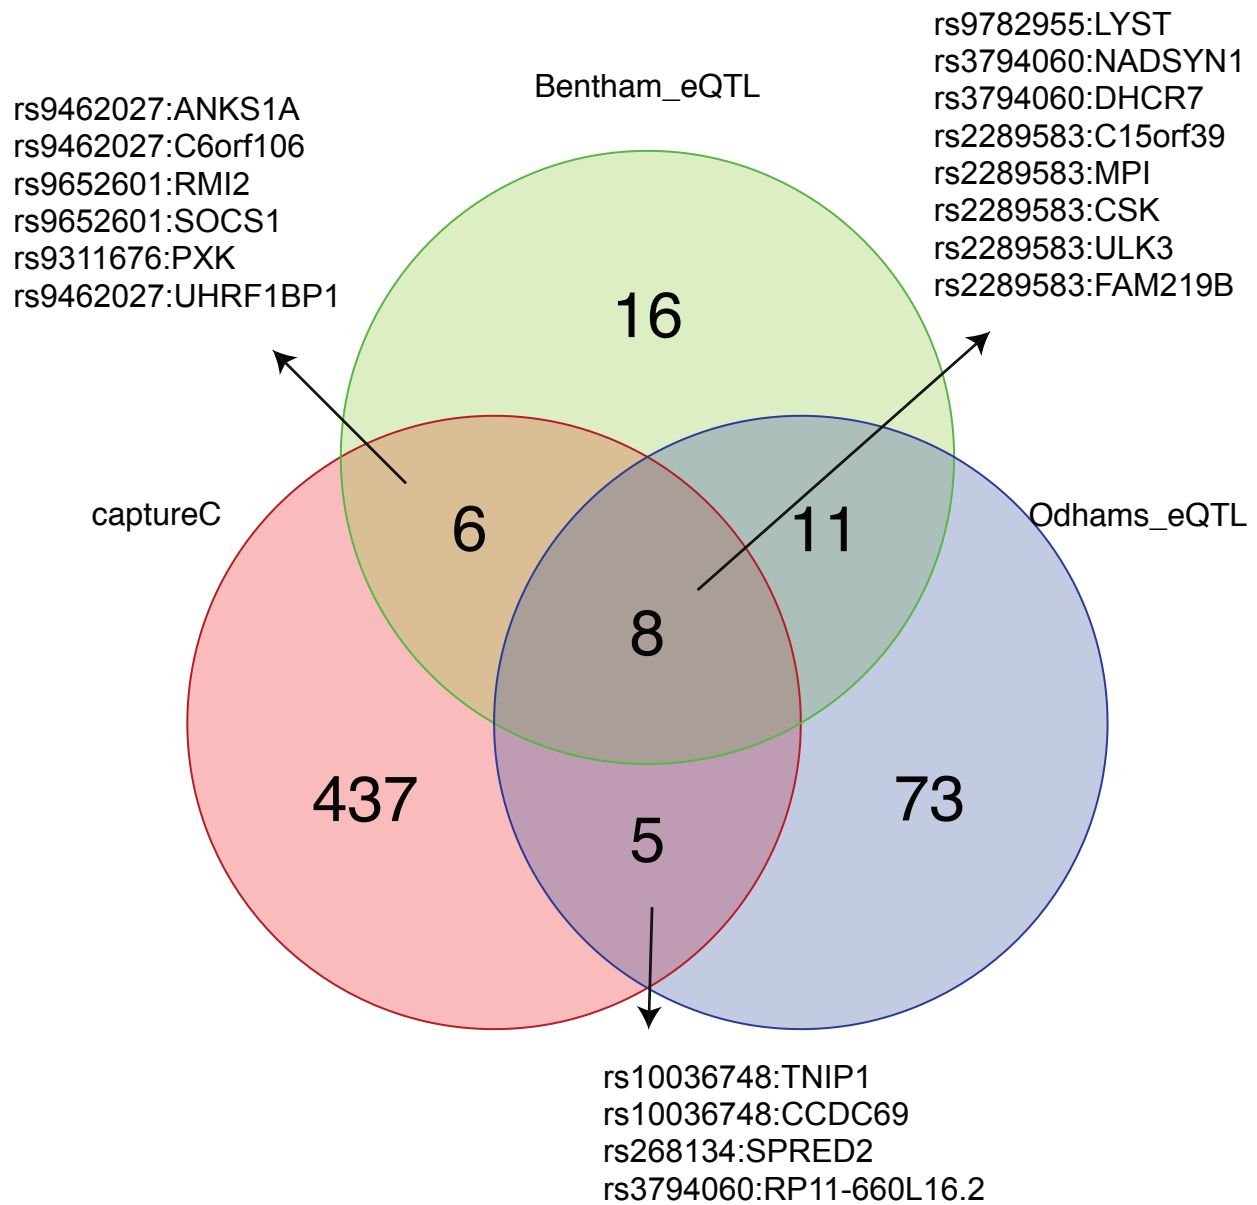

SUPPLEMENTARY FIGURE 7. Comparison of SLE SNP-gene associations obtained by promoter-open chromatin connectomes vs. eQTL studies. Comparison of sentinel SNP-gene pairs implicated by the promoter-open chromatin connectomes in this study vs. sentinel SNP-gene pairs statistically associated in two SLE eQTL studies<sup>7,29</sup>. SNP-gene pairs shared by each group are detailed.



# SUPPLEMENTAL FIGURE 8

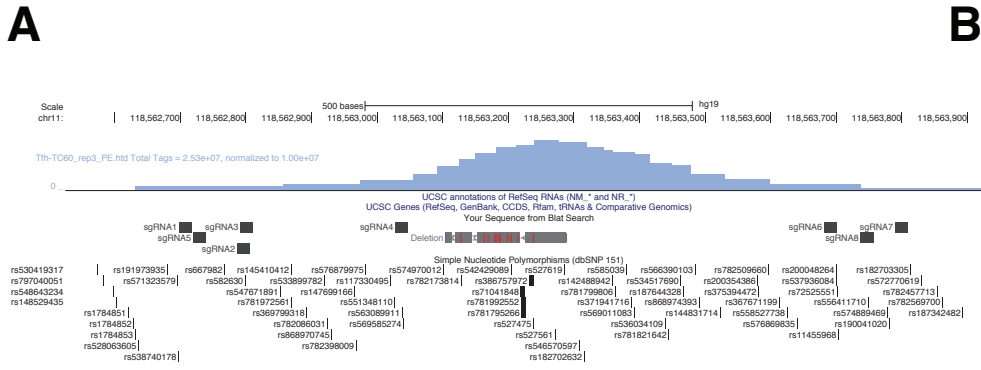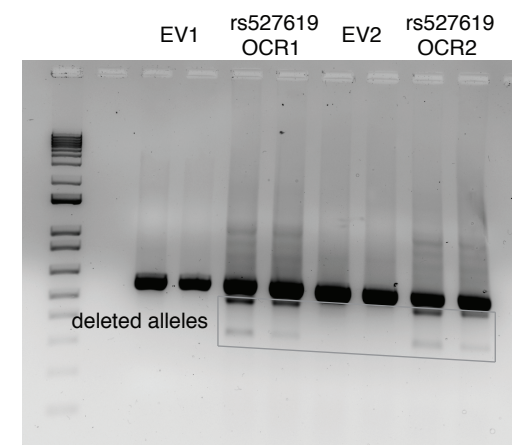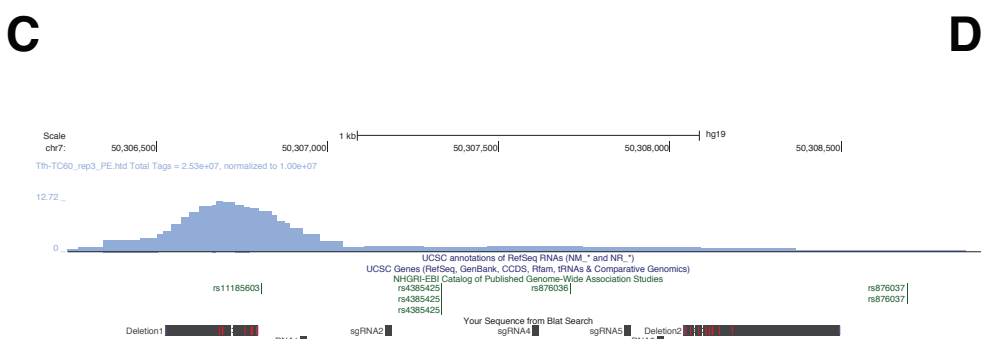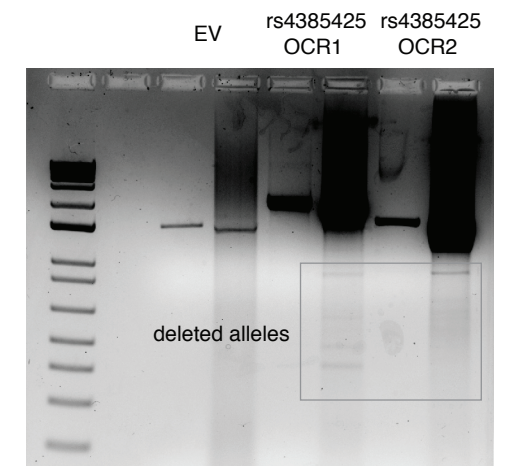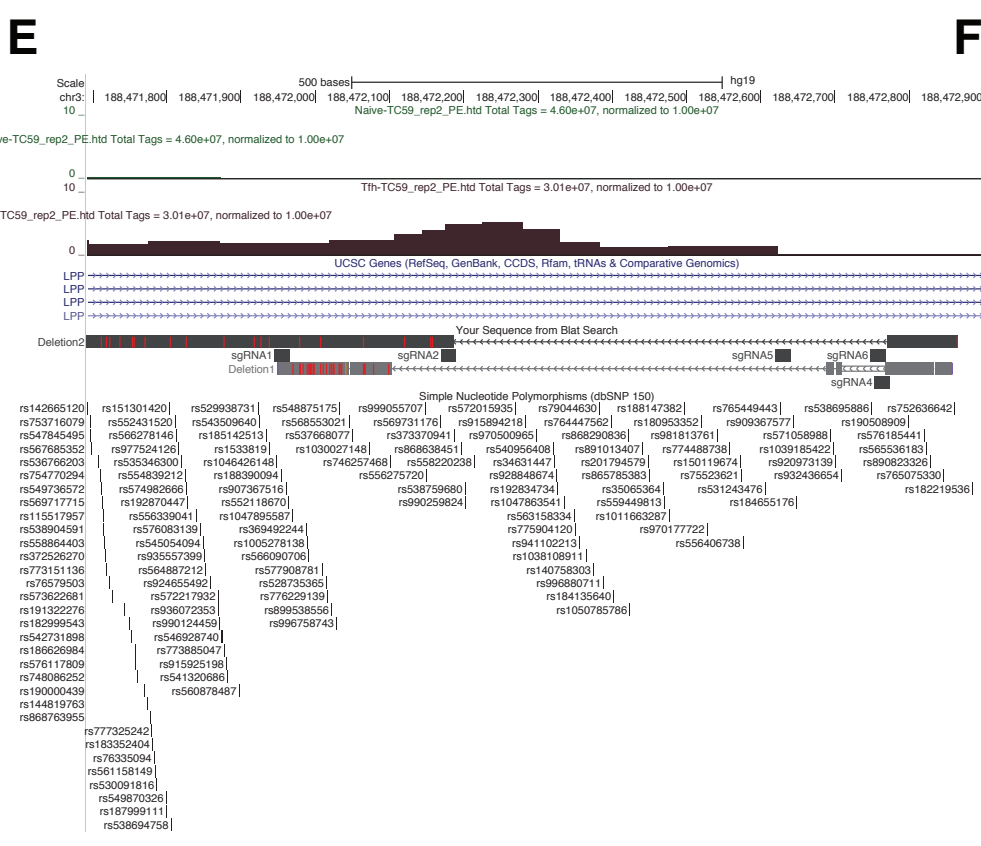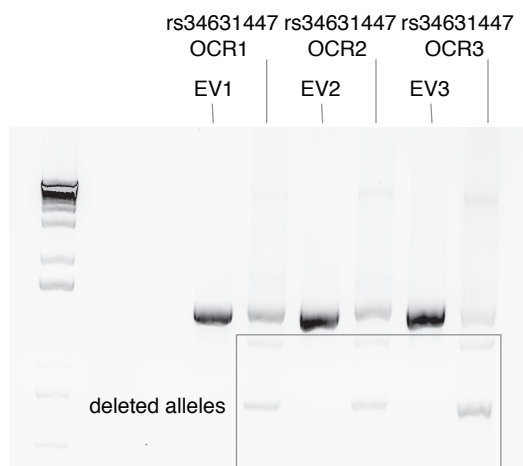

SUPPLEMENTARY FIGURE 8. CRISPR/CAS9-based editing of accessible genomic regions containing SLE GWAS proxy SNP in Jurkat T cells. a, UCSC genome browser track displaying intergenic TFH OCR near the TREH gene harboring the rs527619 and rs71041848 proxies to the rs4639966 SLE sentinel SNP that interacts with CXCR5 (chr11:118,563,185-118,563,321). Eight sgRNAs flanking the OCR and Sanger sequencing identifying several deletions present within the OCR are depicted. b, Electrophoresis gel analysis of PCR amplified regions encompassing the targeted region showing two distinct deletions present at 500bp and 350bp. c, Genomic region surrounding the TFH OCR containing the rs4385425 SNP proxy to the sentinel SLE SNP rs11185603 (chr7:50307234-50307447) that interacts with IKZF1, showing sgRNAs and deletions detected in targeted Jurkat lines. Note that this OCR was called by HOMER, but not by MACS2. d, Electrophoresis gel analysis detects three different deletions at 900bp, 400bp and 350bp. e, Intronic OCR (chr3:188,472,234-188,472,390) in the LPP locus harboring the rs34631447 and rs79044630 SNPs proxy to sentinel rs6762714 SLE SNP and found connected to BCL6. This region was targeted with five total sgRNAs surrounding the OCR and Sanger sequencing showed two distinct deletions. f, Electrophoresis gel analysis detects 1200bp and 821bp deletions. All experiments were performed in three biological replicates.

## SUPPLEMENTAL FIGURE 9

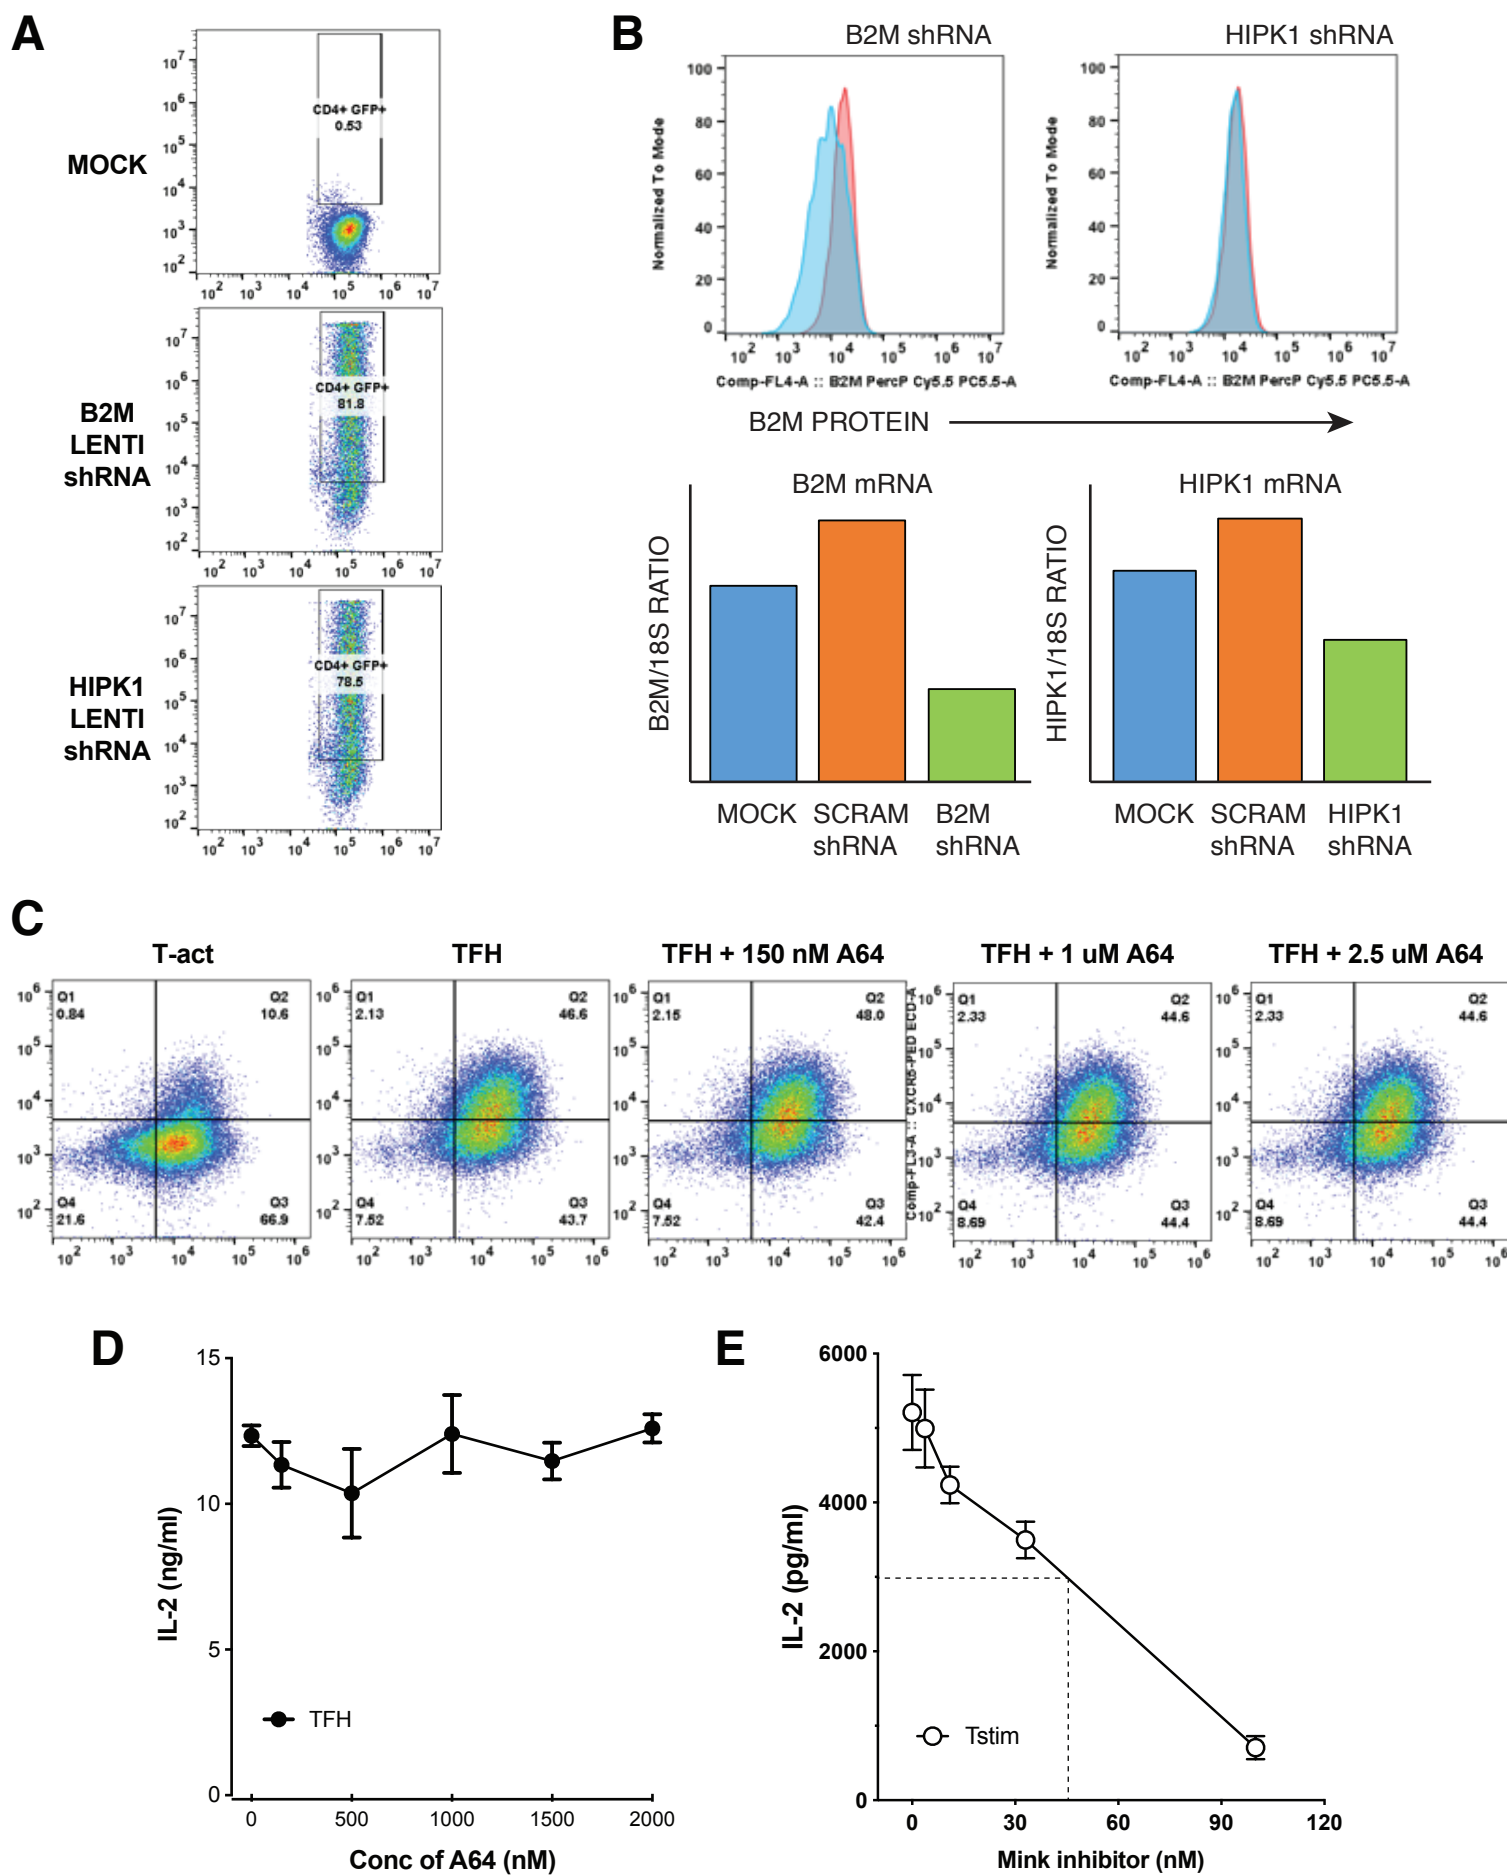

SUPPLEMENTARY FIGURE 9. Promoter-variant connectome-guided targeting of novel kinases for modulation of primary human TFH function. a, Lentiviral delivery of B2M shRNA and HIPK1 shRNA into in vitro differentiated TFH as assessed by GFP fluorescence by flow cytometry. b, Assessment of shRNA-mediated knock-down of B2M and HIPK1 in TFH by flow cytometry and qRT-PCR. Red histograms are TFH transduced with scrambled control shRNA, and blue histograms depict TFH transduced with specific B2M (left panel) or HIPK1 (right panel) shRNA. c, Effect of HIPK inhibitory drug treatment on TFH differentiation in vitro as measured by co-induction of PD-1 and CXCR5. d, The HIPK inhibitory drug A64 does not affect IL-2 secretion by TFH cells as measured by ELISA. e, A MINK inhibitory drug inhibits IL-2 secretion by activated T cells with an ED50 of ~50 nM. All data are representative of 3-4 replicate experiments.

## SUPPLEMENTAL FIGURE 10

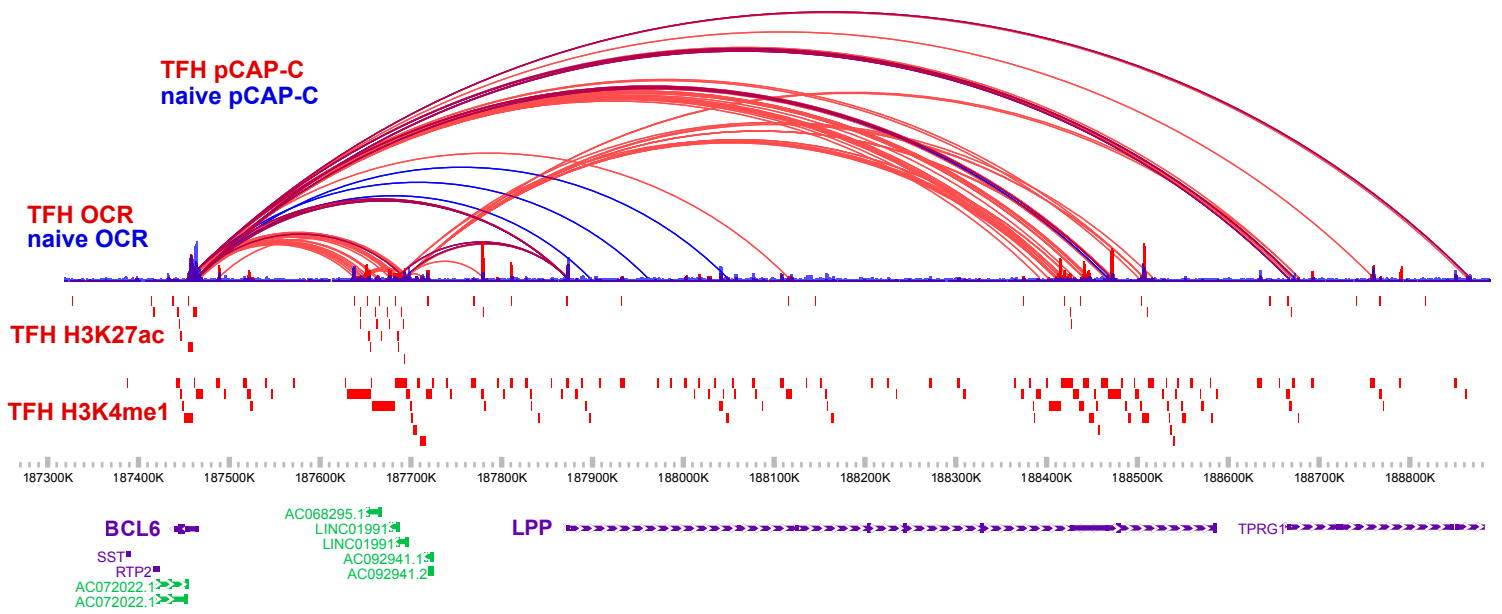

SUPPLEMENTARY FIGURE 10. 3D epigenomic map of promoter-Capture-C, ATAC-seq, H3K27ac, and H3K4me1 in the BCL6-LPP region in naive (blue) and TFH cells (red).
